# Supplementary material for: Release of coarse woody detritus-related carbon: a synthesis across forest biomes
Source: Carbon Balance Manag. 2020 Jan 15;15:1. doi: 10.1186/s13021-019-0136-6 (PMC7227111; doi:10.1186/s13021-019-0136-6)
Supplement: Supplementary file 2 — Additional file 2. Spreadsheet containing data used in analysis of decomposition rate-constants. [file 13021_2019_136_MOESM2_ESM.xlsx]

## Sheet: Data for analysis
Genus	Species	subspecies	Family	Climate zone	Forest type	Positon	Diameters (cm)	Model type	Target variable	k (per year)	stderr k (per year)	Decay resistance	Initial density (Mg per m cubed)	Reported precipitation (mm per year)	Reported temperature ( C )	WC precipitation (mm per year)	WC temperature ( C )	Reference
Abies	amabilis	.	Pineacae	Temperate	EF	CWD-downed	>10	S	density	0.005	-99	0	0.423	2300	4.7	1930	4.71333	Ericson et al, 1985
Abies	amabilis	.	Pineacae	Temperate	EF	CWD-downed	8 - 12	S	mass	0.051	0.003	0	0.382	2500	10	1526	8.66233	Harmon et al 2005
Abies	balsamea	.	Pineacae	Temperate	EF	CWD-downed	8 - 15	S	density	0.0112	-99	0	0.352	1800	0	1409	3.684	Lambert et al. 1980
Abies	balsamea	.	Pineacae	Temperate	EF	CWD-downed	10 - 15	S	density	0.029	-99	0	0.36	1335	3.4	1197	6.63167	Foster and Lang 1982
Abies	balsamea	.	Pineacae	Temperate	EF	CWD-downed	8 - 15	S	mass	0.0299	-99	0	0.36	1800	0	1409	3.684	Lambert et al. 1980
Abies	concolor	.	Pineacae	Temperate	EF	CWD-downed	>10	S	mass	0.035	0.003	0	0.396	1054	4	1182	3.859	Harmon et al 2005
Abies	concolor	.	Pineacae	Temperate	EF	CWD-downed	20	S	density	0.049	-99	0	0.396	1130	10.35	548	6.21667	Harmon et al. 1987
Abies	concolor	.	Pineacae	Temperate	EF	CWD-downed	>10	S	mass	0.051	0.004	0	0.396	1130	8	784	1.043	Harmon et al 2005
Abies	grandis	.	Pineacae	Temperate	EF	CWD-downed	>10	S	mass	0.038	0.009	0	0.396	813	7	548	6.21667	Harmon et al 2005
Abies	lasiocarpa	.	Pineacae	Temperate	EF	CWD-downed	15	L	mass	0.029	0.002	0	-99	660	2	583	2.244	Laiho and Prescott 1999
Abies	lasiocarpa	.	Pineacae	Temperate	EF	CWD-downed	>10	S	mass	0.035	0.003	0	-99	737	0.5	612	0.486	Harmon et al 2005
Abies	lasiocarpa	.	Pineacae	Temperate	EF	CWD-downed	15	S	mass	0.054	0.007	0	-99	638	2.85	846	3.96467	Herrmann and Prescott 2008
Abies	magnifica	.	Pineacae	Temperate	EF	CWD-downed	>10	S	mass	0.043	0.004	0	0.396	1054	4	1182	3.859	Harmon et al 2005
Abies	procera	.	Pineacae	Temperate	EF	CWD-downed	>10	S	mass	0.023	0.004	0	0.396	2221	6.7	1526	8.66233	Harmon et al 2005 a
Abies	procera	.	Pineacae	Temperate	EF	CWD-downed	>10	S	mass	0.03	0.009	0	0.396	1778	8.3	893	7.99467	Harmon et al 2005 a
Abies	siberica	.	Pineacae	Boreal	EF	CWD-various	>8	S	density	0.032	0.001	0	0.349	601	1.38	657	1.237	Shorohova and Kapitsa 2014
Acer	rubrum	.	Sapindaceae	Temperate	DF	CWD-downed	>10	S	mass	0.17	0.013	0	0.436	1202	15.1	1168	15.0837	Harmon et al unpublished
Acer	rubrum	.	Sapindaceae	Temperate	DF	CWD-downed	15	S	density	0.081	0.015	0	0.559	1820	12.9	1924	11.8973	Mattson et al 1987
Acer	rubrum	.	Sapindaceae	Temperate	DF	CWD-downed	5 - 15	S	density	0.08	-99	0	0.58	1470	13	1460	12.5803	Harmon 1982
Acer	saccharinum	.	Sapindaceae	Temperate	DF	CWD-downed	-99	S	mass	0.089	-99	0	-99	866	11.4	1016	11.1797	Chueng and Brown 1995
Acer	saccharum	.	Sapindaceae	Temperate	DF	CWD-downed	>10	S	density	0.037	-99	0	0.68	737	6.7	778	6.88167	Hale and Pastor 1998
Acer	saccharum	.	Sapindaceae	Temperate	DF	CWD-downed	>10	S	density	0.079	0.007	0	-99	1395	5.5	1048	7.18667	Johnson et al 2014
Acer	sp	.	Sapindaceae	Temperate	DF	CWD-downed	4 - 47	S	density	0.0452	-99	0	0.4916	1180	11.3	1169	12.468	MacMillan 1988
Allocasuarina	fraseriana	.	Casuarinaceae	Temperate	EF	CWD-downed	3 - 15	S	mass	0.072	-99	2	0.44	1035	17.5	382	17.6777	Brown et al 1996
Alnus	rubra	.	Betulaceae	Temperate	EF	CWD-downed	>10	S	mass	0.055	-99	0	-99	2489	10	1060	11.366	Harmon et al 2005 a
Alnus	rubra	.	Betulaceae	Temperate	EF	CWD-downed	>10	S	mass	0.083	0.012	0	-99	2500	10	1526	8.66233	Harmon et al 2005 a
Angiosperma	sp	.	na	Temperate	DF	CWD-downed	> 3	S	mass	0.096	-99	0	0.6	1300	5	1048	7.18667	Arthur et al 1993
Arbutus	menziesii	.	Ericaceae	Temperate	EF	CWD-downed	>10	S	mass	0.016	0.002	0	-99	2900	11	1797	11.6727	Campbell et al 2016
Arbutus	menziesii	.	Ericaceae	Temperate	EF	CWD-standing	>10	S	mass	0.01	0.002	0	-99	2900	11	1797	11.6727	Campbell et al 2016
Beaucarnea	pliabilis	.	Asparagaceae	Tropical	TD	CWD-downed	15	S	density	0.531	-99	0	0.27	1100	25	1195	13.96	Harmon et al. 1995
Beilschmiedia	tawa	.	Laurelaceae	Temperate	EF	CWD-downed	-99	S	density	0.0312	0.0039	0	-99	1600	10.25	1424	12.111	Beets et al 2008
Betula	alleghaniensis	.	Betulaceae	Temperate	DF	CWD-downed	>10	S	density	0.065	0.006	0	-99	1395	5.5	1048	7.18667	Johnson et al 2014
Betula	costata	.	Betulaceae	Boreal	MF	CWD-downed	>10	S	mass	0.03	0.003	0	0.516	909	1.9	773	0.00733333	Yatskov et al 2003
Betula	costata	.	Betulaceae	Boreal	MF	CWD-standing	>10	S	mass	0.071	0.003	0	0.516	909	-1.9	773	0.00733333	Yatskov et al 2003
Betula	lenta	.	Betulaceae	Temperate	DF	CWD-downed	21.5	S	density	0.149	-99	0	0.707	1820	12.9	1924	11.8973	Mattson et al 1987
Betula	paperifera	.	Betulaceae	Boreal	MF	CWD-downed	>10	S	density	0.053	-99	0	0.531	950	0.7	877	1.07967	Brais et al 2006
Betula	pendula	.	Betulaceae	Boreal	DF	CWD-various	>8	S	density	0.066	0.002	0	0.481	601	1.38	657	1.237	Shorohova and Kapitsa 2014
Betula	pendula	.	Betulaceae	Boreal	DF	CWD-downed	>10	S	density	0.042	0.005	0	0.474	216	-0.6	597	-0.480667	Harmon et al 2000
Betula	pendula	.	Betulaceae	Boreal	DF	CWD-downed	>10	S	mass	0.054	0.013	0	0.474	708	3.4	618	4.11933	Yatskov et al 2003
Betula	pendula	.	Betulaceae	Boreal	DF	CWD-downed	>10	S	mass	0.061	0.006	0	0.474	361	-3.2	465	0.662	Yatskov et al 2003
Betula	pendula	.	Betulaceae	Boreal	DF	CWD-downed	>10	S	mass	0.078	0.008	0	0.474	909	-1.9	773	0.00733333	Yatskov et al 2003
Betula	pendula	.	Betulaceae	Boreal	EF	CWD-downed	>10	S	mass	0.042	0.004	0	0.48	700	3.75	608	4.157	Yatskov et al 2003
Betula	pendula	.	Betulaceae	Boreal	EF	CWD-downed	>10	S	mass	0.046	0.006	0	0.48	700	3.75	608	4.157	Harmon et al 2000
Betula	pendula	.	Betulaceae	Boreal	DF	CWD-downed	> 2	L	mass	0.148	-99	0	0.543	-99	-99	639	9.72433	Swift et al 1976
Betula	pendula	.	Betulaceae	Boreal	DF	CWD-standing	>10	S	mass	0.027	0.008	0	0.474	708	3.4	618	4.11933	Yatskov et al 2003
Betula	pendula	.	Betulaceae	Boreal	DF	CWD-standing	>10	S	mass	0.052	0.009	0	0.474	216	-0.6	597	-0.480667	Yatskov et al 2003
Betula	pendula	.	Betulaceae	Boreal	DF	CWD-standing	>10	S	mass	0.056	0.009	0	0.474	361	-3.2	465	0.662	Yatskov et al 2003
Betula	pendula	.	Betulaceae	Boreal	DF	CWD-standing	>10	S	mass	0.077	0.022	0	0.474	909	-1.9	773	0.00733333	Yatskov et al 2003
Betula	pubescens	.	Betulaceae	Boreal	EF	CWD-downed	> 10	S	density	0.045	-99	0	0.4922	700	3	608	4.157	Krankina and Harmon 1994
Betula	pubescens	.	Betulaceae	Boreal	DF	CWD-downed	> 2	L	mass	0.148	-99	0	0.543	-99	-99	639	9.72433	Swift et al 1976
Betula	sp	.	Betulaceae	Boreal	EF	CWD-downed	15 - 60	S	mass	0.039	-99	0	-99	650	4	642	4.36	Tarasov and Birdsey 2001
Betula	sp	.	Betulaceae	Boreal	EF	CWD-downed	5 - 15	S	mass	0.088	-99	0	-99	650	4	642	4.36	Tarasov and Birdsey 2001
Blomia	cupanioides	.	Sapindaceae	Tropical	TD	CWD-downed	15	S	density	0.024	-99	0	0.79	1100	25	1195	13.96	Harmon et al. 1995
Bossiaea	laidlawiana	.	Fabeaceae	Temperate	DF	CWD-downed	4.3	S	mass	0.093	0.003	0	-99	1480	15	244	24.0047	O'Connell 1997
Bossiaea	laidlawiana	.	Fabeaceae	Temperate	DF	CWD-downed	1.7	S	mass	0.114	0.004	0	-99	1480	15	244	24.0047	O'Connell 1997
Brosimum	alicastrum	.	Moraceae	Tropical	TD	CWD-downed	30	S	density	0.107	-99	0	0.62	1100	25	1195	13.96	Harmon et al. 1995
Brosimum	alicastrum	.	Moraceae	Tropical	TD	CWD-downed	15	S	density	0.172	-99	0	0.62	1100	25	1195	13.96	Harmon et al. 1995
Bursera	simaruba	.	Burseraceae	Tropical	TD	CWD-downed	15	S	density	0.372	-99	0	0.33	1100	25	1195	13.96	Harmon et al. 1995
Bursera	simaruba	.	Burseraceae	Tropical	TD	CWD-downed	30	S	density	0.615	-99	0	0.33	1100	25	1195	13.96	Harmon et al. 1995
Bursera	simaruba	0	Burseraceae	Tropical	TD	CWD-downed	>10	S	mass	0.414	0.024	0	0.339244	1307	27	1185	26.12	Harmon et al unpublished
Bursera	simaruba	0	Burseraceae	Tropical	TD	CWD-downed	10 to 13	S	mass	0.853299	-99	0	0.34575	4200	27	2454	25.48	Harmon et al unpublished
Bursera	simaruba	.	Burseraceae	Tropical	TD	CWD-downed	>10	S	mass	0.643	0.0066	0	-99	900	25	966	24.6	Eaton and Lawrence 2006
Calocedrus	decurrens	.	Cupressaceae	Temperate	EF	CWD-downed	>10	S	mass	0.02	0.009	3	-99	1255	8	784	1.043	Harmon et al 2005 a
Carya	sp	.	Juglandaceae	Temperate	DF	CWD-downed	5 - 70	S	density	0.035	-99	0	0.4829	1180	11.3	1169	12.468	MacMillan 1988
Carya	sp	.	Juglandaceae	Temperate	DF	CWD-downed	5 - 15	S	density	0.08	-99	0	0.77	1470	13	1460	12.5803	Harmon 1982
Carya	sp	.	Juglandaceae	Temperate	DF	CWD-downed	13	S	density	0.166	0.0161	0	0.795	1820	12.9	1924	11.8973	Mattson et al 1987
Carya	sp	.	Juglandaceae	Temperate	DF	CWD-downed	>10	S	mass	0.183	-99	0	-99	1410	13.1	1198	13.959	Harris et al 1972
Carya	tomentosa	.	Juglandaceae	Temperate	DF	CWD-downed	>10	S	mass	0.213	0.044	0	0.611	1202	15.1	1168	15.0837	Harmon et al unpublished
Castanea	dentata	.	Fagaceae	Temperate	DF	CWD-downed	7.6	S	density	0.041	-99	3	0.451	1820	12.9	1924	11.8973	Mattson et al 1987
Castanopsis	chinensis	.	Fagaceae	Tropical	ST	CWD-downed	>10	S	density	0.1095	-99	1	0.824	1956	21.5	1776	21.4	Yang et al 2010
Cornus	florida	.	Cornaceae	Temperate	DF	CWD-downed	5 - 15	S	density	0.05	-99	0	0.7	1470	13	1460	12.5803	Harmon 1982
Cornus	florida	.	Cornaceae	Temperate	DF	CWD-downed	6.3	S	density	0.125	0.007	0	0.808	1820	12.9	1924	11.8973	Mattson et al 1987
Coryllus	avellana	.	Betulaceae	Temperate	DF	CWD-downed	> 2	L	mass	0.28	-99	0	0.558	-99	-99	639	9.72433	Swift et al 1976
Cryptocarya	concinna	.	Laurelaceae	Tropical	ST	CWD-downed	>11	S	density	0.149	-99	0	0.61	1956	21.5	1776	21.4	Yang et al 2010
Dacrycarpus	dacrydioides	.	Podocarpaceae	Temperate	EF	CWD-downed	-99	S	density	0.0316	0.0127	1	-99	1600	10.25	1424	12.111	Beets et al 2008
Dacrydium	cupressinum	.	Podocarpaceae	Temperate	EF	CWD-downed	-99	S	density	0.0308	0.0041	1	-99	1600	10.25	1424	12.111	Beets et al 2008
Dalbergia	glomerata	.	Fabeaceae	Tropical	TR	CWD-downed	>10	0	mass	0.362	0.021	0	0.487987	4200	27	2454	25.48	Harmon et al unpublished
Diospyros	virginia	.	Ebenaceae	Temperate	DF	CWD-downed	12	S	density	0.261	-99	0	-99	1820	12.9	1924	11.8973	Mattson et al 1987
Eucalyptus	calophylla	.	Myrtaceae	Temperate	EF	CWD-downed	3 - 15	S	mass	0.215	-99	1	0.4	1035	17.5	382	17.6777	Brown et al 1996
Eucalyptus	camaldulensis	.	Myrtaceae	Temperate	EF	CWD-downed	>10	S	density	0.0043	-99	2	-99	459	17.25	407	16.5737	Robinson 1997
Eucalyptus	diversicolor	.	Myrtaceae	Temperate	EF	CWD-downed	3 - 15	S	mass	0.174	-99	1	0.47	1035	17.5	382	17.6777	Brown et al 1996
Eucalyptus	maculata	.	Myrtaceae	Temperate	EF	CWD-downed	0	S	density	0.0484	-99	2	-99	1100	16.2	952	15.0547	Mackensen and Bauhus 2003
Eucalyptus	marginata	.	Myrtaceae	Temperate	EF	CWD-downed	3 - 15	S	mass	0.067	-99	2	0.5	1035	17.5	382	17.6777	Brown et al 1996
Eucalyptus	obliqua	.	Myrtaceae	Tropical	EF	CWD-downed	0	LOG	density	0.0085	-99	0	-99	895	11.6	1555	10.0707	Grove et al 2009
Eucalytus	regnans	.	Myrtaceae	Temperate	EF	CWD-downed	0	S	density	0.0698	-99	2	-99	1400	13.5	962	12.8907	Mackensen and Bauhus 2003
Fagus	grandifolia	.	Fagaceae	Temperate	DF	CWD-downed	5 - 35	S	density	0.0189	-99	0	0.3984	1180	11.3	1169	12.468	MacMillan 1988
Fagus	grandifolia	.	Fagaceae	Temperate	DF	CWD-downed	>10	S	density	0.097	0.009	0	-99	1395	5.5	1048	7.18667	Johnson et al 2014
Fagus	grandifolia	.	Fagaceae	Temperate	DF	CWD-downed	>10	0	mass	0.142	0.026	0	0.57	1202	15.1	1168	15.0837	Harmon et al unpublished
Fagus	sylvatica	.	Fagaceae	Temperate	DF	CWD-downed	> 2	S	mass	0.315	-99	0	0.6	-99	-99	774	10.1523	Boddy and Swift 1984
Fagus	sylvatica	.	Fagaceae	Temperate	DF	CWD-downed	0	S	density	0.0452	-99	0	0.705	-99	-99	461	-0.266333	Sander 2002
Fagus	sylvatica	.	Fagaceae	Temperate	DF	CWD-downed	0	S	density	0.054	0.003	0	-99	878	10.35	585	8.841	Herrmann et al 2015
Fagus	sylvatica	.	Fagaceae	Temperate	DF	CWD-downed	>10	S	mass	0.0857	-99	0	-99	1032	7	987	7.507	Müller-Using and Bartsch 2009
Ficus	yoponensis	.	Moraceae	Tropical	TR	CWD-downed	>10	0	mass	0.666	0.051	0	0.467262	4200	27	2454	25.48	Harmon et al unpublished
Fraxinus	excelsior	.	Oleaceae	Temperate	DF	CWD-downed	> 2	L	mass	0.165	-99	0	0.522	-99	-99	639	9.72433	Swift et al 1976
Fraxinus	profunda	.	Oleaceae	Temperate	DF	CWD-downed	7.5 - 20	S	density	0.061	-99	0	-99	1500	22	1551	19.2643	Rice et al 1997
Hiliocarpus	appendiculatus	.	Malvacaea	Tropical	TR	CWD-downed	>10	S	mass	0.975	-99	0	0.17893	4200	27	2454	25.48	Harmon et al unpublished
Juniperius	virginiana	.	Cupressaceae	Temperate	DF	CWD-downed	>10	S	mass	0.013	-99	3	0.393	1202	15.1	1168	15.0837	Harmon et al unpublished
Larix	dahurica	.	Pineacae	Boreal	DF	CWD-downed	>10	S	mass	0.015	0.002	2	0.455	909	-1.9	773	0.00733333	Yatskov et al 2003
Larix	dahurica	.	Pineacae	Boreal	DF	CWD-standing	>10	S	mass	0.009	0.012	2	0.455	909	-1.9	773	0.00733333	Yatskov et al 2003
Larix	siberica	.	Pineacae	Boreal	DF	CWD-downed	>10	S	mass	0.023	0.002	2	0.455	361	-3.2	465	0.662	Yatskov et al 2003
Larix	siberica	.	Pineacae	Boreal	DF	CWD-downed	>10	S	mass	0.031	0.002	2	0.455	216	-0.6	597	-0.480667	Yatskov et al 2003
Larix	siberica	.	Pineacae	Boreal	DF	CWD-standing	>10	S	mass	0.004	0.005	2	0.455	361	-3.2	465	0.662	Yatskov et al 2003
Larix	siberica	.	Pineacae	Boreal	DF	CWD-standing	>10	S	mass	0.01	0.001	2	0.455	216	-0.6	597	-0.480667	Yatskov et al 2003
Liquidambar	styraciflua	.	Altingiaceae	Temperate	DF	CWD-downed	>10	S	mass	0.166	0.008	0	0.449	1202	15.1	1168	15.0837	Harmon et al unpublished
Liriodendron	tulipifera	.	Magnoliaceae	Temperate	DF	CWD-downed	>10	S	mass	0.154	0.009	0	0.38	1202	15.1	1168	15.0837	Harmon et al unpublished
Liriodendron	tulipifera	.	Magnoliaceae	Temperate	DF	CWD-downed	>10	S	mass	0.312	-99	0	-99	1410	13.1	1198	13.959	Harris et al 1972
Lonchocarpus	castilloi	.	Fabeaceae	Temperate	TD	CWD-downed	12	S	mass	0.214	0.066	0	-99	900	25	966	24.6	Eaton and Lawrence 2006
Lysiloma	bahamensis	.	Fabeaceae	Tropical	TD	CWD-downed	12	S	mass	0.124	0.085	0	-99	900	25	966	24.6	Eaton and Lawrence 2006
Manilkara	zapota	.	Sapotaceae	Tropical	TD	CWD-downed	>10	S	density	0.008	-99	2	0.81	1100	25	1195	13.96	Harmon et al. 1995
Manilkara	zapota	.	Sapotaceae	Tropical	TD	CWD-downed	>10	0	mass	0.159	0.015	2	0.710443	1307	27	1185	26.12	Harmon et al unpublished
multiple	fastest	.	na	Tropical	TR	CWD-downed	> 10	S	NA	0.67	-99	0	0.625	2200	26.7	2383	26.32	Chambers et al 2000
multiple	fastest	.	na	Tropical	TR	CWD-downed	>10-20	S	density	0.068	-99	0	0.72	2692	25.6	2394	26.43	Brown 1987
multiple	mean	.	na	Tropical	TR	CWD-downed	> 10	S	NA	0.19	-99	1	0.625	2200	26.7	2383	26.32	Chambers et al 2000
multiple	slowest	.	na	Tropical	TR	CWD-downed	> 10	S	NA	0.015	-99	2	0.625	2200	26.7	2383	26.32	Chambers et al 2000
multiple	slowest	.	na	Tropical	TR	CWD-downed	> 40	S	density	0.019	-99	2	0.72	2692	25.6	2394	26.43	Brown 1987
multiple	sp	.	na	Tropical	TR	CWD-downed	>5	S	density	0.19	-99	1	0.58	1807	25	1168	15.08	Kira 1978
multiple	sp	.	na	Temperate	DF	CWD-downed	5 - 33	S	NA	0.07	0.018	0	-99	1470	13	1460	2.58	Busing 2005
multiple	sp	.	na	Tropical	TD	CWD-downed	0	S	mass	0.11	-99	1	-99	1641	25.9	1288	25.78	John 1973
multiple	sp	.	na	Tropical	TR	CWD-downed	10	S	density	0.123	-99	0	-99	3013	26.2	2352	21.3	Yoneda et al 1990
multiple	sp	.	na	Tropical	TR	CWD-downed	> 10	S	NA	0.188	-99	0	-99	2200	25	2150	25.42	Baker al al 2007
multiple	sp	.	na	Tropical	TR	CWD-downed	>10	S	mass	0.461	-99	1	-99	2692	25.6	2394	26.43	Lang and Knight 1979
multiple	sp	.	na	Tropical	TR	CWD-stumps	>10	S	mass	0.109	-99	0	-99	3537	25.3	1899	24.64	Odum 1970
Myrcianthes	fragans	.	Myrtaceae	Tropical	TD	CWD-downed	30	S	density	0.052	-99	2	0.73	1100	25	1195	13.96	Harmon et al. 1995
Nothofagus	fusca	.	Nothofagacea	Temperate	EF	CWD-downed	-99	S	density	0.0235	0.0023	0	-99	1600	10.25	1424	12.111	Beets et al 2008
Nothofagus	menziesii	.	Nothofagacea	Temperate	EF	CWD-downed	-99	S	density	0.0233	0.0243	0	-99	1600	10.25	1424	12.111	Beets et al 2008
Nothofagus	pumilio	.	Nothofagacea	Temperate	DF	CWD-downed	1 - 60	S	mass	0.015	-99	1	0.55	800	5.5	596	4.231	Frangi et al 1997
Nothofagus	sp	.	Nothofagacea	Temperate	DF	CWD-downed	> 20	S	density	0.0088	-99	0	0.42	2285	9.5	3766	7.01167	Stewart and Burrows 1994
Nyssa	sylvatica	.	Nyssaceae	Temperate	DF	CWD-downed	10.8	S	density	0.126	0.021	0	0.525	1820	12.9	1924	11.8973	Mattson et al 1987
Nyssa	sylvatica	.	Nyssaceae	Temperate	DF	CWD-downed	5 - 15	S	density	0.2	-99	0	0.56	1470	13	1460	12.5803	Harmon 1982
Oxydendrum	arboreum	.	Ericaceae	Temperate	DF	CWD-downed	5 - 15	S	density	0.05	-99	0	0.58	1470	13	1460	12.5803	Harmon 1982
Oxydendrum	arboreum	.	Ericaceae	Temperate	DF	CWD-downed	12.7	S	density	0.033	0.017	0	0.59	1820	12.9	1924	11.8973	Mattson et al 1987
Picea	abies	.	Pineacae	Boreal	EF	CWD-downed	> 10	S	density	0.034	-99	0	0.3314	700	3	608	4.157	Krankina and Harmon 1994
Picea	abies	.	Pineacae	Boreal	EF	CWD-downed	>10	S	density	0.027	0.002	0	0.347	700	3.75	608	4.157	Harmon et al 2000
Picea	abies	.	Pineacae	Boreal	EF	CWD-downed	>10	S	mass	0.033	0.002	0	0.347	700	3.75	608	4.157	Harmon et al 2000
Picea	abies	.	Pineacae	Boreal	EF	CWD-downed	>10	S	mass	0.026	0.003	0	0.358	708	3.4	618	4.11933	Yatskov et al 2003
Picea	abies	.	Pineacae	Temperate	EF	CWD-downed	4.7-19	S	density	0.0242	-99	0	0.392	-99	-99	1051	6.158	Kahl 2003
Picea	abies	.	Pineacae	Boreal	EF	CWD-downed	>8	S	density	0.032	0.001	0	0.395	601	1.38	657	1.237	Shorohova and Kapitsa 2014
Picea	abies	.	Pineacae	Boreal	EF	CWD-downed	4.3 - 34.7	S	density	0.033	-99	0	0.4	747	4	1002	3.24633	Naesset 1999
Picea	abies	.	Pineacae	Boreal	EF	CWD-downed	> 4	S	mass	0.015	-99	0	0.424	750	2.6	642	4.30533	Shorohova and Shorohov 2001
Picea	abies	.	Pineacae	Boreal	EF	CWD-standing	> 4	S	mass	0.008	-99	0	0.424	750	2.6	642	4.30533	Shorohova and Shorohov 2001
Picea	abies	.	Pineacae	Temperate	EF	CWD-downed	0	S	density	0.033	0.001	0	-99	878	10.35	585	8.841	Herrmann et al 2015
Picea	abies	.	Pineacae	Boreal	EF	CWD-downed	5 - 20	S	mass	0.059	-99	0	-99	650	4	642	4.36	Tarasov and Birdsey 2001
Picea	abies	.	Pineacae	Boreal	EF	CWD-standing	>10	S	mass	0.044	0.018	0	0.358	708	3.4	618	4.11933	Yatskov et al 2003
Picea	ajanensis	.	Pineacae	Boreal	EF	CWD-downed	>10	S	mass	0.028	0.002	0	0.358	909	-1.9	773	0.00733333	Yatskov et al 2003
Picea	ajanensis	.	Pineacae	Boreal	EF	CWD-standing	>10	S	mass	0.035	0.003	0	0.358	909	-1.9	773	0.00733333	Yatskov et al 2003
Picea	engelmannii	.	Pineacae	Temperate	EF	CWD-downed	> 30	L	density	0.0015	-99	0	0.33	-99	-99	496	2.23833	Brown et al 1998
Picea	engelmannii	.	Pineacae	Temperate	EF	CWD-downed	5 - 15	S	density	0.00395	-99	0	0.574	600	0.5	990	5.18433	Johnson and Greene 1991
Picea	engelmannii	.	Pineacae	Temperate	EF	CWD-downed	>10	S	mass	0.028	0.002	0	-99	737	0.5	612	0.486	Harmon et al 2005 a
Picea	glauca	.	Pineacae	Boreal	EF	CWD-downed	9 - 24	S	density	0.071	-99	0	0.3445	640	1	707	6.24167	Alban and Pastor 1993
Picea	glauca	.	Pineacae	Boreal	EF	CWD-downed	>10	S	density	0.038	-99	0	0.426	950	0.7	877	1.07967	Brais et al 2006
Picea	glauca	.	Pineacae	Boreal	EF	CWD-downed	15	S	mass	0.024	0.004	0	-99	638	2.85	846	3.96467	Herrmann and Prescott 2008
Picea	glauca	.	Pineacae	Boreal	EF	CWD-downed	15	Sig	mass	0.05	0.006	0	-99	660	2	583	2.244	Laiho and Prescott 1999
Picea	lutzii	.	Pineacae	Temperate	EF	CWD-downed	>10	S	mass	0.019	-99	0	0.37	623	1.1	796	2.617	Harmon et al 2005 b
Picea	lutzii	.	Pineacae	Temperate	EF	CWD-standing	>10	S	mass	0.0001	-99	0	0.37	623	1.1	796	2.617	Harmon et al 2005 b
Picea	mariana	.	Pineacae	Boreal	EF	CWD-downed	>10	L	density	0.004	-99	0	0.428	-99	-99	461	-0.266333	Sander 2002
Picea	obovata	.	Pineacae	Boreal	EF	CWD-downed	>10	S	mass	0.049	0.006	0	0.358	361	-3.2	465	0.662	Yatskov et al 2003
Picea	obovata	.	Pineacae	Boreal	EF	CWD-standing	>10	S	mass	-0.006	0.0043	0	0.358	361	-3.2	465	0.662	Yatskov et al 2003
Picea	rubens	.	Pineacae	Temperate	EF	CWD-downed	10 - 15	S	density	0.011	-99	0	0.4	1335	3.85	1197	6.63167	Foster and Lang 1982
Picea	rubens	.	Pineacae	Temperate	EF	CWD-downed	15 - 25	S	density	0.014	-99	0	0.4	1335	3.85	1197	6.63167	Foster and Lang 1982
Picea	rubens	.	Pineacae	Temperate	EF	CWD-downed	>25	S	density	0.022	-99	0	0.4	1335	3.85	1197	6.63167	Foster and Lang 1982
Picea	rubens	.	Pineacae	Temperate	EF	CWD-downed	15 - 25	S	density	0.027	-99	0	0.43	1335	3.85	1197	6.63167	Foster and Lang 1982
Picea	rubens	.	Pineacae	Temperate	EF	CWD-downed	>25	S	density	0.032	-99	0	0.43	1335	3.85	1197	6.63167	Foster and Lang 1982
Picea	rubens	.	Pineacae	Temperate	EF	CWD-downed	10 - 15	S	density	0.033	-99	0	0.43	1335	3.85	1197	6.63167	Foster and Lang 1982
Picea	sitchensis	.	Pineacae	Temperate	EF	CWD-downed	>60	S	density	0.0096	-99	0	0.434	3550	8.9	582	6.38667	Graham and Cromack 1982
Picea	sitchensis	.	Pineacae	Temperate	EF	CWD-downed	< 60	S	density	0.0111	-99	0	0.434	3550	8.9	582	6.38667	Graham and Cromack 1982
Picea	sitchensis	.	Pineacae	Temperate	EF	CWD-downed	< 60	S	density	0.0119	-99	0	0.434	3550	8.9	582	6.38667	Graham and Cromack 1982
Picea	sitchensis	.	Pineacae	Temperate	EF	CWD-downed	>10	S	mass	0.023	-99	0	-99	2489	10	1060	11.366	Harmon et al 2005 a
Picea	sitchensis	.	Pineacae	Temperate	EF	CWD-downed	>10	S	density	0.059	-99	0	-99	850	9.3	1128	9.58	Olajuyigbe et al 2011
Pinus	banksiana	.	Pineacae	Boreal	EF	CWD-downed	> 5	L	density	0.005	-99	0	0.38	-99	-99	995	-2.279	Sander 2002
Pinus	banksiana	.	Pineacae	Boreal	EF	CWD-downed	>10	S	mass	0.062	0.013	0	0.395	780	3.3	708	3.76767	Harmon et al unpublished
Pinus	banksiana	.	Pineacae	Boreal	EF	CWD-downed	>10	S	density	0.02	-99	0	0.397	950	0.7	877	1.07967	Brais et al 2006
Pinus	banksiana	.	Pineacae	Boreal	EF	CWD-downed	9 - 24	S	density	0.042	-99	0	0.4195	640	1	707	6.24167	Alban and Pastor 1993
Pinus	contorta	.	Pineacae	Temperate	EF	CWD-downed	>10	S	mass	0.018	0.002	0	0.391	737	0.5	612	0.486	Harmon et al unpublished
Pinus	contorta	.	Pineacae	Temperate	EF	CWD-downed	>10	S	mass	0.023	0.002	0	-99	737	0.5	612	0.486	Harmon et al 2005 a
Pinus	contorta	.	Pineacae	Temperate	EF	CWD-downed	>10	S	mass	0.042	-99	0	-99	813	7	548	6.21667	Harmon et al 2005 a
Pinus	contorta	.	Pineacae	Temperate	EF	CWD-downed	15	S	mass	0.072	0.006	0	-99	638	2.85	846	3.96467	Herrmann and Prescott 2008
Pinus	contorta	.	Pineacae	Temperate	EF	CWD-downed	15	Sig	mass	0.082	0.002	0	-99	660	2	583	2.244	Laiho and Prescott 1999
Pinus	contorta	.	Pineacae	Temperate	EF	CWD-standing	>10	S	mass	0.002	0.0004	0	0.391	737	0.5	612	0.486	Harmon et al unpublished
Pinus	contorta	latifolia	Pineacae	Temperate	EF	CWD-downed	> 30	L	density	0.0004	-99	0	0.36	-99	-99	496	2.23833	Brown et al 1998
Pinus	contorta	latifolia	Pineacae	Temperate	EF	CWD-downed	> 30	L	volume	0.0032	-99	0	0.36	-99	-99	496	2.23833	Brown et al 1998
Pinus	contorta	latifolia	Pineacae	Temperate	EF	CWD-downed	5 - 15	S	density	0.0167	-99	0	0.444	600	0.5	990	5.18433	Johnson and Greene 1991
Pinus	contorta	latifolia	Pineacae	Temperate	EF	CWD-downed	>10	S	density	0.0163	-99	0	0.455	600	4	518	3.97	Fahey 1983
Pinus	contorta	Murayana	Pineacae	Temperate	EF	CWD-downed	15 - 41	S	density	0.027	-99	0	0.44	280	-99	288	7.11	Busse 1994
Pinus	jeffreyii	.	Pineacae	Temperate	EF	CWD-downed	>10	S	mass	0.042	-99	0	-99	1255	8	784	1.043	Harmon et al 2005 a
Pinus	koraiensis	.	Pineacae	Temperate	EF	CWD-downed	>10	S	mass	0.015	0.001	0	0.336	909	-1.9	773	0.00733333	Yatskov et al 2003
Pinus	koraiensis	.	Pineacae	Temperate	EF	CWD-downed	>10	S	density	0.016	-99	0	-99	782	3.9	950	1.26067	Harmon and Chen 1991
Pinus	koraiensis	.	Pineacae	Temperate	EF	CWD-standing	>10	S	mass	0.003	0.002	0	0.336	909	-1.9	773	0.00733333	Yatskov et al 2003
Pinus	lambertina	.	Pineacae	Temperate	EF	CWD-downed	>10	S	mass	0.036	-99	0	-99	1255	8	784	1.043	Harmon et al 2005 a
Pinus	monticola	.	Pineacae	Temperate	EF	CWD-downed	>10	S	mass	0.035	0.012	0	-99	813	7	548	6.21667	Harmon et al 2005 a
Pinus	pinaster	.	Pineacae	Temperate	EF	CWD-downed	3 - 15	S	mass	0.049	-99	0	0.43	1035	17.5	382	17.6777	Brown et al 1996
Pinus	ponderosa	.	Pineacae	Temperate	EF	CWD-downed	8 - 12	S	density	0.01	-99	0	0.411	600	8.3	401	8.003	Ericson et al, 1985
Pinus	ponderosa	.	Pineacae	Temperate	EF	CWD-downed	>10	S	mass	0.011	0.005	0	-99	813	7	548	6.21667	Harmon et al 2005 a
Pinus	radiata	.	Pineacae	Temperate	EF	CWD-downed	> 2.5	S	density	0.074	0.01	0	0.38	870	10.4	1005	10.2943	Ganjegunte et al 2004
Pinus	radiata	.	Pineacae	Temperate	EF	CWD-downed	> 2.5	S	density	0.015	0.004	0	0.6	870	10.4	1005	10.2943	Ganjegunte et al 2004
Pinus	radiata	.	Pineacae	Temperate	EF	CWD-downed	0	S	density	0.125	-99	0	-99	791	13.4	1202	10.586	Mackensen and Bauhus 2003
Pinus	radiata	.	Pineacae	Temperate	EF	CWD-downed	-99	S	density	0.1374	0.008	0	-99	1820	14	1862	11.108	Garret et al 2008
Pinus	radiata	.	Pineacae	Temperate	EF	CWD/FWD-downed	>5	S	mass	0.121	-99	0	-99	622	13	690	12.1	Guo et al 2006
Pinus	resinosa	.	Pineacae	Temperate	EF	CWD-downed	9 - 24	S	density	0.055	-99	0	0.354	640	1	707	6.24167	Alban and Pastor 1993
Pinus	rigida	.	Pineacae	Temperate	DF	CWD-downed	5 - 15	S	density	0.06	-99	0	0.56	1470	13	1460	12.5803	Harmon 1982
Pinus	siberica	.	Pineacae	Boreal	EF	CWD-downed	>10	S	mass	0.019	0.002	0	0.336	216	-0.6	597	-0.480667	Yatskov et al 2003
Pinus	siberica	.	Pineacae	Boreal	EF	CWD-downed	>8	S	density	0.014	-99	0	0.374	600	-3	663	-2.08767	Mackensen and Bauhus 2003
Pinus	siberica	.	Pineacae	Boreal	EF	CWD-standing	>10	S	mass	0.003	0.001	0	0.336	216	-0.6	597	-0.480667	Yatskov et al 2003
Pinus	sp	.	Pineacae	Temperate	EF	CWD-downed	>10	S	mass	0.01	0.004	0	-99	2900	11	1797	11.6727	Campbell et al 2016
Pinus	sp	.	Pineacae	Temperate	EF	CWD-standing	>10	S	mass	0.001	0.003	0	-99	2900	11	1797	11.6727	Campbell et al 2016
Pinus	sylvestris	.	Pineacae	Boreal	EF	CWD-downed	>10	S	mass	0.027	0.005	0	0.362	708	3.4	618	4.11933	Yatskov et al 2003
Pinus	sylvestris	.	Pineacae	Boreal	EF	CWD-downed	>10	S	mass	0.036	0.003	0	0.362	216	-0.6	597	-0.480667	Yatskov et al 2003
Pinus	sylvestris	.	Pineacae	Boreal	EF	CWD-downed	>10	S	mass	0.044	0.003	0	0.362	909	-1.9	773	0.00733333	Yatskov et al 2003
Pinus	sylvestris	.	Pineacae	Boreal	EF	CWD-downed	>10	S	density	0.024	0.003	0	0.384	700	3.8	608	4.157	Harmon et al 2000
Pinus	sylvestris	.	Pineacae	Boreal	EF	CWD-downed	>10	S	mass	0.035	0.003	0	0.384	700	3.75	608	4.157	Harmon et al 2000
Pinus	sylvestris	.	Pineacae	Boreal	EF	CWD-downed	> 10	S	density	0.033	-99	0	0.3941	700	3	608	4.157	Krankina and Harmon 1994
Pinus	sylvestris	.	Pineacae	Temperate	EF	CWD-downed	0	S	density	0.028	-99	0	0.43	-99	-99	554	-2.086	Wirth 2000
Pinus	sylvestris	.	Pineacae	Boreal	EF	CWD-various	>8	S	density	0.027	0.001	0	0.46	601	1.38	657	1.237	Shorohova and Kapitsa 2014
Pinus	sylvestris	.	Pineacae	Boreal	EF	CWD-downed	35 - 60	S-tl	mass	0.018	-99	0	-99	650	4	642	4.36	Tarasov and Birdsey 2001
Pinus	sylvestris	.	Pineacae	Boreal	EF	CWD-downed	15 - 35	S-tl	mass	0.0185	-99	0	-99	650	4	642	4.36	Tarasov and Birdsey 2001
Pinus	sylvestris	.	Pineacae	Boreal	EF	CWD-downed	0	S	density	0.032	0.002	0	-99	878	10.35	585	8.841	Herrmann et al 2015
Pinus	sylvestris	.	Pineacae	Boreal	EF	CWD-downed	5 - 15	S-tl	mass	0.041	-99	0	-99	650	4	642	4.36	Tarasov and Birdsey 2001
Pinus	sylvestris	.	Pineacae	Temperate	MF	CWD-downed	5 - 10	S	mass	0.079	-99	0	-99	812	9.3	841	9.108	De Vries and Kuyper 1988
Pinus	sylvestris	.	Pineacae	Boreal	EF	CWD-standing	>10	S	mass	-0.02	0.011	0	0.362	361	-3.2	465	0.662	Yatskov et al 2003
Pinus	sylvestris	.	Pineacae	Boreal	EF	CWD-standing	>10	S	mass	0.004	0.003	0	0.362	216	-0.6	597	-0.480667	Yatskov et al 2003
Pinus	sylvestris	.	Pineacae	Boreal	EF	CWD-standing	>10	S	mass	0.037	0.009	0	0.362	708	3.4	618	4.11933	Yatskov et al 2003
Pinus	taeda	.	Pineacae	Temperate	DF	CWD-downed	>10	S	mass	0.095	0.005	0	0.379	1202	15.1	1168	15.0837	Harmon et al unpublished
Pinus	taeda	.	Pineacae	Temperate	EF	CWD-downed	>7	S	density	0.075	-99	0	0.466	1360	15.4	1189	17.224	Barber and Van Lear 1984.
Pinus	taeda	.	Pineacae	Temperate	EF	CWD-downed	>10	S	density	0.122	-99	0	-99	1185	15.5	1196	16.087	Mobley at al 2012
Pinus	taeda	.	Pineacae	Temperate	DF	CWD-downed	>10	S	mass	0.162	-99	0	-99	1410	13.1	1198	13.959	Harris et al 1972
Pinus	virginiana	.	Pineacae	Temperate	DF	CWD-downed	5 - 15	S	density	0.04	-99	0	0.56	1470	13	1460	12.5803	Harmon 1982
Piscidia	communis	.	Fagaceae	Tropical	TD	CWD-downed	13	S	mass	0.131	0.066	0	-99	900	25	966	24.6	Eaton and Lawrence 2006
Populus	tremula	.	Salicaceae	Boreal	DF	CWD-various	>8	S	density	0.066	0.002	0	0.372	601	1.38	657	1.237	Shorohova and Kapitsa 2014
Populus	tremula	.	Salicaceae	Boreal	EF	CWD-downed	25 - 60	S	mass	0.044	-99	0	-99	650	4	642	4.36	Tarasov and Birdsey 2001
Populus	tremula	.	Salicaceae	Boreal	EF	CWD-downed	5 - 25	S	mass	0.071	-99	0	-99	650	4	642	4.36	Tarasov and Birdsey 2001
Populus	tremuloides	.	Salicaceae	Boreal	DF	CWD-downed	>10	S	mass	0.141	0.021	0	0.3656	780	3.3	708	3.76767	Harmon et al unpublished
Populus	tremuloides	.	Salicaceae	Boreal	EF	CWD-downed	9 - 24	S	density	0.08	-99	0	0.3865	640	1	707	6.24167	Alban and Pastor 1993
Populus	tremuloides	.	Salicaceae	Boreal	EF	CWD-downed	> 5	L	density	0.008	-99	0	0.4	-99	-99	461	-0.266333	Sander 2002
Populus	tremuloides	.	Salicaceae	Boreal	MF	CWD-downed	>10	S	density	0.06	-99	0	0.427	950	0.7	877	1.07967	Brais et al 2006
Populus	tremuloides	.	Salicaceae	Boreal	DF	CWD-downed	>10	S	density	0.049	-99	0	-99	618	3	639	3.22867	Miller 1983
Populus	tremuloides	.	Salicaceae	Temperate	DF	CWD-downed	18	S	mass	0.07	-99	0	-99	370	9.9	393	9.385	Gosz 1980
Prumnoptitys	ferruginea	.	Podocarpaceae	Temperate	EF	CWD-downed	-99	S	density	0.052	0.0153	0	-99	1600	10.25	1424	12.111	Beets et al 2008
Prumnoptitys	taxifolia	.	Podocarpaceae	Temperate	EF	CWD-downed	-99	S	density	0.0147	0.0026	0	-99	1600	10.25	1424	12.111	Beets et al 2008
Pseudobombax	ellipticum	.	Malvacaea	Tropical	TD	CWD-downed	>10	S	mass	0.606	0.041	0	0.338178	1307	27	1185	26.12	Harmon et al unpublished
Pseudotsuga	menziesii	.	Pineacae	Temperate	EF	CWD-downed	< 50 - 103	S	density	0.0063	-99	1	0.35	2200	7.05	1317	5.83	Means et al 1985
Pseudotsuga	menziesii	.	Pineacae	Temperate	EF	CWD-downed	40 - 70	S	density	0.01	0.001	1	0.386	2030	7.55	1526	8.66233	Sollins et al 1987
Pseudotsuga	menziesii	.	Pineacae	Temperate	EF	CWD-downed	>10	S	density	0.007	0.002	1	-99	2500	8.7	1252	7.89533	Janisch et al 2005
Pseudotsuga	menziesii	.	Pineacae	Temperate	EF	CWD-downed	<40	S	density	0.009	-99	1	-99	2300	8.5	1317	5.83	Graham 1982
Pseudotsuga	menziesii	.	Pineacae	Temperate	EF	CWD-downed	40-65	S	density	0.009	-99	1	-99	2300	8.5	1317	5.83	Graham 1982
Pseudotsuga	menziesii	.	Pineacae	Temperate	EF	CWD-downed	>65	S	density	0.011	-99	1	-99	2300	8.5	1317	5.83	Graham 1982
Pseudotsuga	menziesii	.	Pineacae	Temperate	EF	CWD-downed	>10	S	mass	0.014	-99	1	-99	2467	8.7	1252	7.89533	Harmon et al 2005 a
Pseudotsuga	menziesii	.	Pineacae	Temperate	EF	CWD-downed	>10	S	mass	0.015	0.001	1	0.449	2500	10	1526	8.66233	Harmon et al 2005 a
Pseudotsuga	menziesii	.	Pineacae	Temperate	EF	CWD-downed	>10	S	mass	0.016	0.003	1	-99	2900	11	1797	11.6727	Campbell et al 2016
Pseudotsuga	menziesii	.	Pineacae	Temperate	EF	CWD-downed	21 - 26	S	mass	0.026	-99	1	-99	1440	9.4	1733	8.91667	Edmonds and Eglitis 1991
Pseudotsuga	menziesii	.	Pineacae	Temperate	EF	CWD-downed	28- 47	S	mass	0.05	-99	1	-99	1440	9.4	1733	8.91667	Edmonds and Eglitis 1991
Pseudotsuga	menziesii	.	Pineacae	Temperate	EF	CWD-standing	>65	S	density	0.003	-99	1	-99	2300	8.5	1317	5.83	Graham 1982
Pseudotsuga	menziesii	.	Pineacae	Temperate	EF	CWD-standing	>10	S	mass	0.01	0.002	1	-99	2900	11	1797	11.6727	Campbell et al 2016
Pseudotsuga	menziesii	.	Pineacae	Temperate	EF	CWD-standing	40-65	S	density	0.013	-99	1	-99	2300	8.5	1317	5.83	Graham 1982
Pseudotsuga	menziesii	.	Pineacae	Temperate	EF	CWD-standing	<40	S	density	0.027	-99	1	-99	2300	8.5	1317	5.83	Graham 1982
Quercus	alba	.	Fagaceae	Temperate	DF	CWD-downed	11	S	density	0.063	0.006	2	0.734	1820	12.9	1924	11.8973	Mattson et al 1987
Quercus	alba	.	Fagaceae	Temperate	DF	CWD-downed	>10	S	mass	0.049	0.005	2	0.572	1202	15.1	1168	15.0837	Harmon et al unpublished
Quercus	coccinea	.	Fagaceae	Temperate	DF	CWD-downed	5 - 15	S	density	0.1	-99	1	0.68	1470	13	1460	12.5803	Harmon 1982
Quercus	coccinea	.	Fagaceae	Temperate	DF	CWD-downed	15	S	density	0.05	0.006	1	0.716	1820	12.9	1924	11.8973	Mattson et al 1987
Quercus	petraea	.	Fagaceae	Temperate	DF	CWD-downed	> 2	L	mass	0.067	-99	1	0.574	-99	-99	639	9.72433	Swift et al 1976
Quercus	prinus	.	Fagaceae	Temperate	DF	CWD-downed	5 - 15	S	density	0.18	-99	1	0.66	1470	13	1460	12.5803	Harmon 1982
Quercus	prinus	.	Fagaceae	Temperate	DF	CWD-downed	8.7	S	density	0.17	0.038	1	0.708	1820	12.9	1924	11.8973	Mattson et al 1987
Quercus	robur	.	Fagaceae	Temperate	DF	CWD-downed	> 2	L	mass	0.067	-99	1	0.574	-99	-99	639	9.72433	Swift et al 1976
Quercus	robur	.	Fagaceae	Temperate	DF	CWD-downed	>1	S	mass	0.26	-99	1	-99	-99	-99	720	7.64633	Christensen 1977
Quercus	rubra	.	Fagaceae	Temperate	DF	CWD-downed	>10	S	density	0.0244	-99	1	0.66	737	6.7	837	7.198	Hale and Pastor 1998
Quercus	rubra	.	Fagaceae	Temperate	DF	CWD-downed	>10	S	mass	0.09	0.011	1	0.553	1202	15.1	1168	15.0837	Harmon et al unpublished
Quercus	sp	.	Fagaceae	Temperate	DF	CWD-downed	5 - 95	S	density	0.0175	-99	1	0.4878	1180	11.3	1169	12.468	MacMillan 1988
Quercus	sp	.	Fagaceae	Temperate	DF	CWD-downed	25 - 35	S	density	0.069	-99	1	0.65	1230	9.5	397	9.63867	Schowalter et al 1998
Quercus	sp	.	Fagaceae	Temperate	DF	CWD-downed	>10	S	density	0.0295	-99	1	-99	1200	12.2	1169	12.468	MacMillan 1981
Quercus	sp	.	Fagaceae	Temperate	DF	CWD-downed	>10	S	mass	0.16	-99	1	-99	1410	13.1	1198	13.959	Harris et al 1972
Quercus	velutina	.	Fagaceae	Temperate	DF	CWD-downed	>10	S	mass	0.065	0.001	1	0.563	1202	15.1	1168	15.0837	Harmon et al unpublished
Rhizophora	sp	.	Rhizophoraceae	Tropical	TR	CWD-downed	0	S	mass	0.0831	-99	0	0.4255	3133	23.8	1169	12.47	Robertson and Daniel 1989
Robinia	pseudoaccacia	.	Fabeaceae	Temperate	DF	CWD-downed	9.7	S	density	0.015	0.005	3	0.734	1820	12.9	1924	11.8973	Mattson et al 1987
Sabal	sp	.	Arecaceae	Tropical	TD	CWD-downed	>10	S	mass	0.449	0.07	0	0.56709	1307	27	1185	26.12	Harmon et al unpublished
Schima	superba	.	Theaceae	Tropical	ST	CWD-downed	>12	S	density	0.157	-99	1	0.887	1956	21.5	1776	21.4	Yang et al 2010
Swartzia	cubensis	.	Fabeaceae	Tropical	TD	CWD-downed	>10	S	mass	0.244	0.036	0	0.653863	1307	27	1185	26.12	Harmon et al unpublished
Swietenia	macrophylla	.	Meliaceae	Tropical	TD	CWD-downed	>10	S	mass	0.218	0.026	1	0.5	1307	27	1185	26.12	Harmon et al unpublished
Tabebuia	rosea	.	Bignoniaceae	Tropical	TD	CWD-downed	15	S	density	0.061	-99	1	0.76	1100	25	1195	13.96	Harmon et al. 1995
Talisia	olivaeformis	.	Sapindaceae	Tropical	TD	CWD-downed	15	S	density	0.03	-99	0	0.79	1100	25	1195	13.96	Harmon et al. 1995
Thuja	plicata	.	Cupressaceae	Temperate	EF	CWD-downed	20 - 40	S	density	0.009	0.001	2	0.318	2030	7.55	1526	8.66233	Sollins et al 1987
Thuja	plicata	.	Cupressaceae	Temperate	EF	CWD-downed	>10	S	mass	0.007	0.002	2	0.338	2500	10	1526	8.66233	Harmon et al 2005 a
Tilia	amurensis	.	Malvacaea	Temperate	EF	CWD-downed	>10	S	density	0.027	-99	0	-99	782	3.9	950	1.26067	Harmon and Chen 1991
Tsuga	canadensis	.	Pineacae	Temperate	EF	CWD-downed	25 - 35	S	density	0.021	-99	0	0.36	780	5.5	786	4.00433	Tyrrell and Crow 1994
Tsuga	canadensis	.	Pineacae	Temperate	DF	CWD-downed	5 - 15	S	density	0.04	-99	0	0.43	1470	13	1460	12.5803	Harmon 1982
Tsuga	heterophylla	.	Pineacae	Temperate	EF	CWD-downed	20 - 40	S	density	0.016	0.003	0	0.348	2030	7.55	1526	8.66233	Sollins et al 1987
Tsuga	heterophylla	.	Pineacae	Temperate	EF	CWD-downed	> 30	S	density	0.0079	-99	0	0.374	3550	8.9	582	6.38667	Graham and Cromack 1982
Tsuga	heterophylla	.	Pineacae	Temperate	EF	CWD-downed	< 30	S	density	0.01	-99	0	0.374	3550	8.9	582	6.38667	Graham and Cromack 1982
Tsuga	heterophylla	.	Pineacae	Temperate	EF	CWD-downed	>10	S	density	0.023	-99	0	0.374	3550	8.9	582	6.38667	Graham and Cromack 1982
Tsuga	heterophylla	.	Pineacae	Temperate	EF	CWD-downed	30 - 41	S	mass	0.0118	-99	0	0.42	3420	10.15	1851	10.9603	Grier 1978
Tsuga	heterophylla	.	Pineacae	Temperate	EF	CWD-downed	<25	S	density	0.012	-99	0	-99	2300	8.5	1317	5.83	Graham 1982
Tsuga	heterophylla	.	Pineacae	Temperate	EF	CWD-standing	>25	S	density	0.016	-99	0	-99	2300	8.5	1317	5.83	Graham 1982
Tsuga	heterophylla	.	Pineacae	Temperate	EF	CWD-standing	<25	S	density	0.017	-99	0	-99	2300	8.5	1317	5.82667	Graham 1982
Tsuga	heterophylla	.	Pineacae	Temperate	EF	CWD-downed	>10	S	mass	0.018	-99	0	-99	2467	8.7	1526	8.66233	Harmon et al 2005 a
Tsuga	heterophylla	.	Pineacae	Temperate	EF	CWD-downed	>10	S	mass	0.023	-99	0	-99	2489	10	1060	11.366	Harmon et al 2005 a
Tsuga	heterophylla	.	Pineacae	Temperate	EF	CWD-downed	>25	S	density	0.024	-99	0	-99	2300	8.5	1317	5.83	Graham 1982
Tsuga	heterophylla	.	Pineacae	Temperate	EF	CWD-downed	>10	S	mass	0.026	0.002	0	0.411	2500	10	1526	8.66233	Harmon et al 2005 a
Tsuga	heterophylla	.	Pineacae	Temperate	EF	CWD-downed	>10	S	density	0.036	0.008	0	-99	2500	8.7	1252	7.89533	Janisch et al 2005

## Sheet: Data sources
Data sources
Alban DH, Pastor J (1993) Decomposition of aspen, spruce, and pine boles on two sites in Minnesota. Canadian Journal of Forest Research 23, 1744-1749.
Arthur MA, Tritton LM, Fahey TJ (1993) Dead bole mass and nutrients remaining 23 years after clear-felling of a northern hardwood forest. Canadian Journal of Forest Research 23,1298-1305.
Baker, TR, Coronado, ENH, Phillips, OL, Martin, J, van der Heijden, GM, Garcia, M, Espejo, JS (2007) Low stocks of coarse woody debris in a southwest Amazonian forest. Oecologia, 152, 495-504.
Barber, BL Van Lear DH (1984) Weight loss and nutrient dynamics in decomposing woody loblolly pine logging slash. Soil Science Society of America Journal, 48, 906-910.
Beets PN, Hood I, Kimberley MO, Oliver GR, Pearce SH, Gardner JF (2008) Coarse woody debris decay rates for seven indigenous tree species in the central North Island of New Zealand. Forest Ecology and Management, 256, 548-557.
Boddy L, Swift MJ (1984) Wood decomposition in an abandoned beech and oak coppiced woodland in SE England III: Decomposition and turnover of twigs and branches.	Holarctic Ecology, 7, 229–238.
Brais S, Paré D, Lierman C (2006) Tree bole mineralization rates of four species of the Canadian eastern boreal forest: implications for nutrient dynamics following stand-replacing disturbances. Canadian Journal of Forest Research, 36, 2331-2340.
Brown, PM, WD Shepperd, SA Mata and DL McClain (1998) Longevity of windthrown logs in a subalpine forest of central Colorado.	Canadian Journal of Forest Research, 28, 932-936.
Brown, S (1987) Tropical forests and the global carbon cycle. In: SV Kossuth and NA Pywell (compilers), Current topics in forest research, emphasis on contributions by women scientists Proceedings of National Symposium November 4-6, 1986, Gainesville, FL General Technical Report SE-46.
Brown S, Mo J, McPherson JK, Bell DT (1996) Decomposition of woody debris in western Australian forests. Canadian Journal of Forest Research, 26, 954-966
Busing RT (2005) Tree mortality, canopy turnover, and woody detritus in old cove forests of the southern Appalachians. Ecology, 86, 73-84
Busse MD (1994) Downed bole-wood decomposition in lodgepole pine forests of central Oregon. Soil Science Society of America Journal 58, 221-227.
Campbell JL, Fontaine J B, Donato DC (2016) Carbon emissions from decomposition or fire-killed trees following a large wildfire in Oregon, United States.	Journal of Geophysical Research: Biogeosciences 121, 728-730, doi:101002/2015JG003165.
Chambers JQ, Higuchi N, Schimel JP, Ferreera LV, Melack JM (2000) Decomposition and carbon cycling of dead trees in tropical forests of the central Amazon. Oecologia, 122, 380-388.
Christensen O (1977) Estimation of standing crop and turnover of dead wood in a Danish oak forest. Oikos, 28, 177-186.
Clark DB, Clark DA, Brown S, Oberbauer SF, Veldkamp E (2002) Stocks and flows of coarse woody debris across a tropical rain forest nutrient and topography gradient. Forest Ecology And Management 164, 237-248.
De Vries BWL, Kuyper TW (1988) Effect of vegetation type on decomposition rates of wood in Drenthe, The Netherlands. Acta Botanica Neerlandica 37, 307-312.
Eaton JM, Lawrence D (2006) Woody debris stocks and fluxes during succession in a dry tropical forest. Forest Ecology and Management, 232, 46-55.
Edmonds RL, Eglitis A (1989) The role of Douglas-fir beetle and wood borers in the decomposition of and nutrient release from Douglas-fir logs. Canadian Journal of Forest Research, 19, 853–859.
Ericson HE, Edmonds RL, Peterson CE	(1985) Decomposition of logging residues in Douglas-fir, western hemlock, Pacific silver fir, and ponderosa pine ecosystems. Canadian Journal of Forest Research, 15, 914-921.
Fahey, TJ (1983) Nutrient dynamics of aboveground detritus in lodgepole pine (Pinus contorta sp latifolia) ecosystems, southeastern Wyoming. Ecological Monographs 53, 51-72.
Foster JR, Lang GE (1982) Decomposition of red spruce and balsam fir boles in the White Mountains of New Hampshire. Canadian Journal of Forest Research 12, 617-626.
Frangi JL, Richter LL, Barrera MD, Aloggia M (1997) Decomposition of Nothofagus fallen woody debris in forests of Tierra del Fuego, Argentina. Canadian Journal of Forest Research, 27, 1095-102.
Ganjegunte GK, Condron LM, Clinton PW, Davis MR, Mahieu, N (2004) Decomposition and nutrient release from radiata pine (Pinus radiata) coarse woody debris. Forest Ecology and Management, 187, 197-211.
Garrett LG, Oliver GR, Pearce SH, Davis MR (2008) Decomposition of Pinus radiata coarse woody debris in New Zealand. Forest Ecology and Management, 255, 3839-3845.
Gosz, JR (1980) Biomass distribution and production budget for a nonaggrading forest ecosystem. Ecology, 61, 507-514.
Graham RL (1982) Biomass dynamics of dead Douglas-fir and western hemlock boles in mid-elevation forests of the Cascade Range. PhD Thesis, Oregon State University, Corvallis
Graham RL, Cromack, Jr K (1982) Mass, nutrient content and decay rate of dead boles in rain forests of Olympic National Park. Canadian Journal of Forest Research 12, 511-521.
Grier CC (1978) A Tsuga heterophylla-Picea sitchensis ecosystem of coastal Oregon: Decomposition and nutrient balances of fallen logs.	Canadian Journal of Forest Research, 8, 198-206.
Grove SJ, Stamm L, Barry C (2009) Log decomposition rates in Tasmanian Eucalyptus obliqua determined using an indirect chronosequence approach. Forest Ecology and Management, 258, 389-397.
Guo, LB, Bek, E and Gifford, RM (2006) Woody debris in a 16-year old Pinus radiata plantation in Australia: mass, carbon and nitrogen stocks, and turnover. Forest Ecology and Management, 228,145-151.
Hale, CM and J Pastor (1998) Nitrogen content, decay rates, and decompositional dynamics of hollow versus solid hardwood logs in hardwood forests of Minnesota, USA. Canadian Journal of Forest Research 28, 1276-1285.
Harmon, M E (1982) Decomposition of Standing Dead Trees in the Southern Appalachian Mountains. Oecologia 52, 214 – 215.
Harmon, M E B Fasth, and J Sexton (2005) Bole decomposition rates of seventeen tree species in Western USA Andrews LTER Web Report (http://wwwfslorstedu/lter/pubs/webdocs/reports/decomp/cwd_decomp_webhtm).
Harmon ME, Fasth B, Yatskov M, Sexton J (2005) The fate of beetle-killed spruce on the Kenai Peninsula: A preliminary report.	General Technical Report R10-TP-134 USDA Forest Service State and Private Forestry, Anchorage, AK 23 p.
Harmon ME, Fasth BG, Sexton J Unpublished data (http://andlterforestryoregonstateedu/data/abstractaspx?dbcode=TD022).
Harmon ME, ON Krankina, Sexton J (2000) Decomposition vectors: a new approach to estimating woody detritus decomposition dynamics. Canadian Journal of Forest Research, 30, 76-84
Harmon, ME and H Chen (1991) Coarse woody debris dynamics in two old‑growth ecosystems: Comparing a deciduous forest in China and a conifer forest in Oregon Bioscience, 41, 604‑610.
Harmon ME, Whigham DF, Sexton J, Olmsted I (1995) Decomposition and mass of woody detritus in the dry tropical forests of the northeastern Yucatan Peninsula, Mexico. Biotropica, 27, 305-316.
Harmon ME, Cromack, Jr K, Smith BG (1987) Coarse woody debris in mixed-conifer forests, Sequoia National Park, California		Canadian Journal of Forest Research, 17,1265-1272.
Harris WF, Henderson GS, Todd DE (1972) Measurement of turnover of biomass and nutrient elements from the woody component of forest litter on walker branch watershed. Eastern Deciduous Forest Biome Memo Report #72-146 pp31, Oak Ridge National Laboratory.
Herrmann S, Prescott, CE (2008) Mass loss and nutrient dynamics of coarse woody debris in three Rocky Mountain coniferous forests: 21 year results. Canadian Journal of Forest Research, 38, 125-132.
Herrmann S, Kah, T, Bauhus J (2015) Decomposition dynamics of coarse woody debris of three important central European tree species. Forest Ecosystems, 2, 27.
Janisch JE, Harmon ME, Chen H, Cromack Jr K, Fasth B, Sexton JM (2005) Carbon flux from coarse woody debris in a Pacific Northwest conifer forest ecosystem: a chronosequence approach. Ecoscience 12, 151-160.
John M (1973) Accumulation and decay of litter and net production of forest in tropical West Africa. Oikos 24, 430-435.
Johnson CE, Siccama TG, Denny EG, Koppers MM, Vogt, DJ (2014) In situ decomposition of northern hardwood tree boles: decay rates and nutrient dynamics in wood and bark. Canadian Journal of Forest Research, 44, 1515-1524.
Johnson EA, Greene DF (1991) A method for studying dead bole dynamics in Pinus contorta var latifolia – Picea engelmannii forests. Journal of Vegetation Science, 2, 523-530
Kahl T (2003) Abbauraten von Fichtentotholz (Picea abies (L) Karst). M Sc thesis, Institut für Ökologie, Biologisch-Pharmazeutische Fakultät Jena, Friedrich-Schiller-Universität: 98.
Kira T (1978) Community architecture and organic matter dynamics in tropical lowland rain forests of Southeast Asia with special reference to Pasoh Forest, West Malaysia. In, Tropical trees as living systems Proceedings of the 4th Cabot Symposium, Harvard Forest, Petersham, Massachusetts, 1976, (Eds) PB Tomlinson and MH Zimmerman, Cambridge University Press, 1978, pp561-590.
Krankina ON, Harmon ME 91994) The impact of intensive forest management on carbon stores in forest ecosystems. World Resource Review, 6, 161-177.
Kruys N, Jonsson BG, Ståhl G (2002) A stage-based matrix model for decay-class dynamics of woody debris. Ecological Applications, 12, 773-781.
Laiho R, Prescott CE (1999) The contribution of coarse woody debris to carbon, nitrogen, and phosphorus cycles in three Rocky Mountain coniferous forests. Canadian Journal of Forest Research 29, 1592-1603.
Lambert RC, Lang GE, Reiners WA (1980) Loss of mass and chemical change in decaying boles of a subalpine balsam fir forest. Ecology, 61, 1460-1473
Lang GE, Knight DH (1979) Decay rates for boles of tropical trees in Panama. Biotropica 11, 316-317
Mackensen J, Bauhus J (2003) Density loss and respiration rates in coarse woody debris of Pinus radiata, Eucalyptus regnans and Eucalyptus maculate. Soil Biology and Biochemistry, 35, 177-186
MacMillan PC (1981) Log decomposition in Donaldson's Woods, Spring Mill State Park, Indiana. American Midland Naturalist 113, 335-344.
MacMillan PC (1988) Decomposition of coarse woody debris in an old-growth Indiana forest. Canadian Journal of Forest Research, 18, 1353- 1362.
Mattson KC, Swank WT, Waide JB (1987) Decomposition of woody debris in a regenerating, clear-cut forest in the Southern Appalachians. Canadian Journal of Forest Research, 17, 712-721.
Means JE, Cromack,Jr K, MacMillan PC (1985) Comparison of decomposition models using wood density of Douglas-fir logs. Canadian Journal of Forest Research 15, 1092-1098.
Miller WE (1983) Decomposition rates of aspen bole and branch litter. Forest Science, 29, 351-356
Mobley ML, Richter DD, Heine PR (2012) Accumulation and decay of woody detritus in a humid subtropical secondary pine forest. Canadian Journal of Forest Research, 43, 109-118.
Müller-Using S, Bartsch N (2009) Decay dynamic of coarse and fine woody debris of a beech (Fagus sylvatica L) forest in Central Germany. European Journal of Forest Research, 128, 287-296.
Naesset E (1999) Decomposition rate constants of Picea abies logs in southeastern Norway. Canadian Journal of Forest Research, 29, 372-381.
O'Connell A M (1997) Decomposition of slash residues in thinned regrowth eucalypt forest in Western Australia. Journal of Applied Ecology, 34, 111-122.
Odum HT (1970) Chapter I-10 Summary: An emerging view of the ecological system at El Verde. In, HT Odum and HF Pigeon (Eds) A TROPICAL RAIN FOREST A Study of Irradiation and Ecology at El Verde, Puerto Rico, pp I-191--I-281 Technical Information Center, US Atomic Energy Commission, Oak Ridge, TN.
Olajuyigbe SO, Tobin B, Gardiner P, Nieuwenhuis M (2011) Stocks and decay dynamics of above-and belowground coarse woody debris in managed Sitka spruce forests in Ireland. Forest Ecology and Management, 262, 1109-1118.
Rice MD, Lockaby BG, Stanturf JA, Keeland BD (1997) Woody debris decomposition in the Atchafalaya River basin of Louisiana following hurricane disturbance. Soil Science Society of America Journal, 61, 1264-1274.
Robertson AI, Daniel PA (1989) Decomposition and the annual flux of detritus from fallen timber in tropical mangrove forests. Limnology and Oceanography, 34, 640-646.
Robinson R (1997) Dynamics of coarse woody debris in floodplain forests: Impact of forest management and flood frequency. Bachelor of Applied Science Honours Dissertation, Charles Sturt University, Australia.
Sander B (2002) Post-fire structure and decomposition dynamics of coarse woody material in the western Canadian boreal forest. PhD thesis, Faculty of Graduate Studies and Research Edmonton, University of Alberta: 101.
Shorohova EV, Shorohov AA (2001) Coarse woody debris dynamics and stores in a boreal virgin spruce forest. Ecological Bulletins, 49,129-135.
Shorohova E, Kapitsa, E (2014) Influence of the substrate and ecosystem attributes on the decomposition rates of coarse woody debris in European boreal forests. Forest Ecology and Management, 315, 173-184.
Sollins P, Cline SP, Verhoeven T, Sachs D, Spycher G (1987) Patterns of log decay in old-growth Douglas-fir forests. Canadian Journal of Forest Research 17, 1585-1595.
Stewart GH, Burrows LE (1994) Coarse woody debris in old-growth temperate beech (Nothofagus) forests of New Zealand. Canadian Journal of Forest Research, 24,1989-1996.
Stone JN, MacKinnon A, Parminter JV, Lertzman KP (1998) Coarse woody debris decomposition documented over 65 years on southern Vancouver Island. Canadian Journal of Forest Research, 28, 788-793.
Swift MJ, Healey IN, Hibberd JK, Sykes JM, Bampoe V, Nesbitt ME (1976) The Decomposition of branch-wood in the canopy and floor of a mixed deciduous woodland. Oecologia, 26,139-149.
Tarasov M E, Birdsey RA (2001) Decay rate and potential storage of coarse woody debris in the Leningrad region. Ecological Bulletins, 49,137-147.
Tyrrell LE, Crow TR (1994) Dynamics of dead wood in old-growth hemlock-hardwood forests of northern Wisconsin and northern Michigan. Canadian Journal of Forest Research, 24, 1672-1683.
Wirth C (2000)	Der Einfluß von Feuer auf den Kohlenstoffhaushalt sibirischer Kiefernwälder (Pinus sylvestris L) unter biogeochemischen und populationsbiologischen. Aspekten PhD thesis, Fakultät für Biologie, Chemie und Geowissenschaften Bayreuth, Universität Bayreuth: 260.
Yang FF, Li YL, Zhou GY, Wenigmann KO, Zhang DQ, Wenigmann M, Liu SZ, Zhang QM (2010) Dynamics of coarse woody debris and decomposition rates in an old-growth forest in lower tropical China. Forest Ecology and Management 259,1666-1672.
Yatskov M, Krankina ON, Harmon ME (2003) A chronosequence of wood decomposition in the boreal forests of Russia. Canadian Journal of Forest Research 33, 1211-1226.
Yoneda T, Tamin R, Ogino K (1990) Dynamics of aboveground big woody organs in a foothill dipterocarp forest, West Sumatra, Indonesia. Ecological Research, 5, 111-130.

## Sheet: Notes and codes
Abbreviations and notes:
Forest Type:
DF = Deciduous Forest
DS = Deciduous Shrubland
DW = Deciduous Woodland (tundra/taiga transition Larix)
EF = Evergreen Forest
EW = Evergreen Woodland (taiga/tundra transition)
MF = Mixed Forest
T = Tropical
TD = Tropical Dry Forest
TR = Tropical Rain Forest
Model:
L = linear equation
S = (negative) single-exponential model
S-tl = single-exponential with time lag
sig = sigmoid function
D = double (or multiple) exponential model
M = matrix (decomposition vectors)
LOG= logarithmic
Target variable
dependent variable of the equation, e. g. mass or density loss
Stratum-Position
CWD = coarse woody debris (mean diameter > 10cm)
FWD = fine woody debris (mean diameter < 10cm)
downed= dead and downed
standing=standing dead or snags
stumps=cut standing <1 m tall
various=standing, donwed, and stumps combined
-99 is missing or unreported data
Reported climate was either that reported by the data source or determined from a local climatic station based on location

## Sheet: Genus and family
Genus	Family
Abies	Pineacae
Acer	Sapindaceae
Allocasuarina	Casuarinaceae
Alnus	Betulaceae
Angiosperma	na
Arbutus	Ericaceae
Beaucarnea	Asparagaceae
Beilschmiedia	Laurelaceae
Betula	Betulaceae
Blomia	Sapindaceae
Bossiaea	Fabeaceae
Brosimum	Moraceae
Bursera	Burseraceae
Calocedrus	Cupressaceae
Carya	Juglandaceae
Castanea	Fagaceae
Castanopsis	Fagaceae
Cornus	Cornaceae
Coryllus	Betulaceae
Cryptocarya	Laurelaceae
Dacrycarpus	Podocarpaceae
Dacrydium	Podocarpaceae
Dalbergia	Fabeaceae
Diospyros	Ebenaceae
Eucalyptus	Myrtaceae
Fagus	Fagaceae
Ficus	Moraceae
Fraxinus	Oleaceae
Heliocarpus	Malvacaea
Juniperus	Cupressaceae
Larix	Pineacae
Liquidambar	Altingiaceae
Liriodendron	Magnoliaceae
Lonchocarpus	Fabeaceae
Lysiloma	Fabeaceae
Manilkara	Sapotaceae
multiple	na
multiple-fastest	na
multiple-mean	na
multiple-slowest	na
Myrcianthes	Myrtaceae
Nothofagus	Nothofagacea
Nyssa	Nyssaceae
Oxydendrum	Ericaceae
Picea	Pineacae
Pinus	Pineacae
Piscidia	Fagaceae
Populus	Salicaceae
Prumnopitys	Podocarpaceae
Pseudobombax	Malvacaea
Pseudotsuga	Pineacae
Quercus	Fagaceae
Rhizophora	Rhizophoraceae
Robinia	Fabeaceae
SabaL	Arecaceae
Schima	Theaceae
Swartzia	Fabeaceae
Swietenia	Meliaceae
Tabebuia	Bignoniaceae
Talisia	Sapindaceae
Thuja	Cupressaceae
Thuja	Cupressaceae
Tilia	Malvacaea
Tsuga	Pineacae

## Sheet: Locations
LOCATION	FOREST TYPE	LATITUDE	LONGITUDE	REFERENCE
US - OR	EF	43.03 N	124.30 W	16
US - WA	EF	43.25 N	124.15 W	23
US - WY	EF	41 N	106 W	25
US - NH	EF	44.01 N	71.48 W	26
US - CA	EF	43.73 N	121.64 W	30
US - NM	DF	35.45 N	105.55 W	40
E	DF	56.16 N	9.57 E	43
AUS	DF	42.13 S	172.16 E	48
AS	EF	41 N	127 E	51
US - OR	EF	44 N	122 W	51
AS	EF	41.00 N	127.00 E	51
US - OR	EF	44.00 N	122.00 W	51
SA	DF	55.00 S	70.00 W	52
E	EF	59 N	31.30 E	55
US - OR	EF	44.14 N	122.11 W	65
US - OR	EF	43.35 N	121.15 W	66
US - MI	EF	45.98 N	89.45 W	67
US - NH	EF	44 N	71 W	68
US - MN	EF	45.50 N	94.00 W	69
AUS	EF	32.00 S	117.00 E	71
US-TN	DF	36.01 N	84.27 W	74
US-IL	DF	40.00 N	88.23 W	75
AUS	EF	35.35 S	145.00 E	76
US - MN	DF	40.20 N	103 W	77
CN	EF	51.02 N	115.03 W	115
US - NC	DF	35.04 N	83.25 W	119
US - SC	EF	34.00 N	80.00 W	121
US - WA	EF	47.2 N	121.3 W	122
US - WA	EF	47.55 N	120.3 W	122
US - NH	DF	43.56 N	71.45 W	134
US - MN	DF	44.42 N	93.30 W	141
US - MN	DF	43.54 N	91.46 W	141
US - CO	EF	39.53 N	105.55 W	146
E	EF	59.52 N	9.56 E	163
E	DF	51.00 N	0.00 E	188
E	MF	53.00 N	5.00 E	190
US - WA	EF	47.12 N	122 W	191
US - WA	EF	47.12 N	122 W	191
AUS	EF	43.25 S	172.16 W	195
US - TN	DF	35.4 N	83.3 W	196
E	EF	59 N	31.30 E	197
CN	EF	50.00 N	118.00 W	198
E	EF	50.45 N	11.45 E	199
US - IN	DF	38.45 N	86.25 W	201
AUS	DF	25.00 S	117.00 E	202
US - LA	DF	31.00 N	92.00 W	203
CN	EF	56.31 N	109.72 W	204
E	DF	117.00 W	52.00 N	204
E	EF	35.00 E	57.00 N	206
E	DF	52.00 N	1.00 W	208
E	DF	52.00 N	1.00 W	208
E	EF	60.00 N	30.00 E	209
E	EF	60.00 N	30.00 E	209
E	EF	60.00 N	30.00 E	209
E	EF	60.00 N	30.00 E	209
AS	EF	60.00 N	89.42 E	210
US-OR-HJA	EF	44.14 N	122.11 W	212
US-OR-KRD	EF	42.34 N	122.1 W	212
US-CA-SNP	EF	36.50 N	118.56 W	212
US-OR-PFEF	EF	43.73 N	121.64 W	212
US-CO-FEF	EF	39.85 N	105.91 W	212
US-OR-KRD	EF	42.34 N	122.1 W	212
US-OR-FRISS	EF	44.14 N	122.11 W	212
US-OR-WSR	EF	45.00 N	121.50 W	212
US-OR-CHEF	EF	45.12 N	123.12 W	212
US-WA-WREF	EF	45.49 N	121.57 W	212
RUS- Khabarovsk	MF	49.00 N	140.00 E	213
RUS-St.-Petersburg	DF	59.00 N	31.5 E	213
RUS- Irkutsk	DF	52.00 N	104.00 E	213
RUS- Krasnoyarsk	DF	56.00 N	93.00 E	213
US-OR-SW	EF	42.29 N	123.9 W	214
US-SE	EF	34.50 N	81.7 W	215
CN-Quebec	MF	48.59 N	79.24 W	216
AUS-NZ	EF	38.13 S	176.00 E	218
AUS-NZ	EF	38.48 S	176.3 E	219
CN-Alberta	EF	52.00 N	120.00 W	220
E-Germany	DF	51.00 N	12.00 E	221
US-WA-WREF	EF	45.49 N	121.58 W	222
US-NH	DF	43.56 N	71.45 W	223
RUS	EF	60.00 N	30.00 E	224
AUS	EF	35.30 S	150.15 E	225
AUS	EF	37.33 S	145.27 E	225
AUS	EF	35.25 S	148.55 E	225
RUS	EF	63.94 N	57.89 E	225
AUS	EF	43.09 S	146.66 E	226
E-Germany	DF	51.72 N	9.62 E	227
US-IN	DF	38.45 N	86.25 W	228
US-MN	DF	48.60 N	93.40 W	229
US-AK	EF	60.54 N	150.76 W	230
US-NC	DF	35.91 N	79.05 W	231
US-MN-MEF	EF	47.32 N	93.28 W	231
US-CO-FEF	EF	39.85 N	105.91 W	231
US-PNW-OR	EF	44.30 N	122.30W	70
CA	TR	8.78 N	82.95 W	189
CA	T	9.16 N	79.85 W	61
A	TD	6.15 N	0.91 W	179
CA-MEX	TD	20 N	88 W	14
SA	TR	2.30 S	60 W	62
AUS	TR	18.5 S	146.12 E	128
AS	TR	2.95 N	102.25 E	131
CA	TR	18.28 N	066.07 W	58
CA	TR	9.16 N	79.85 W	59
AS	ST	23.25 N	112.5 E	232
CA	TD	18.82 N	89.45 W	233
AUS	EF	35.3 S	149.3 E	234
E	EF	52.95 N	7.25 W	235
US-TN	DF	35.4 N	83.3 W	236
SA	TR	12.58 S	69.18 W	237
A	TR	1.0 S	100.5 E	238
CA-MEX	TR	18.58 N	95.08 W	231
CA-MEX	TD	18.5 N	88.5 W	231

## Sheet: WClim data
This file contains the climate data from the WorldClim 2.5 minute database
Months are numbered: January=01 and December 12. variables with p represent monthly precitation; those with tavg the monthly average temperature.
Precipitation is in mm; Temperature degrees C.
When more than one climate line occurs for a reference, the study had multiple locations.
OID_	LOCATION	FOREST_TYP	LATITUDE	LONGITUDE	REFERENCE	Y	X	comments	wc2_p01	wc2_p02	wc2_p03	wc2_p04	wc2_p05	wc2_p06	wc2_p07	wc2_p08	wc2_p09	wc2_p10	wc2_p11	wc2_p12	wc2_tavg01	wc2_tavg02	wc2_tavg03	wc2_tavg04	wc2_tavg05	wc2_tavg06	wc2_tavg07	wc2_tavg08	wc2_tavg09	wc2_tavg10	wc2_tavg11	wc2_tavg12
97	CA-MEX	TD	20 N	88 W	14	20	-88		55	42	39	46	101	154	123	152	197	158	76	52	23.012	23.568	24.636	26.008	27.204	27.6	27.5	27.504	27.2	26.1	24.7	23.6
1	US - OR	EF	43.03 N	124.30 W	16	43.03	-124.3		289	231	237	145	87	44	14	29	52	125	287	311	7.812	8.036	8.152	9.06	10.796	12.388	14.5	15.7	15.48	12.856	9.304	7.44
2	US - WA	EF	43.25 N	124.15 W	23	43.25	124.15		4	5	11	26	48	85	168	131	56	32	11	5	-15.08	-9.892	-1.044	8.544	16.268	21.208	23.948	22.684	15.84	7.712	-2.58	-10.968
3	US - WY	EF	41 N	106 W	25	41	-106		30	28	43	51	57	54	56	48	44	36	38	33	-6.1	-5.012	-1.82	1.92	7.204	12.44	15.74	14.964	10.584	4.852	-1.664	-5.468
4	US - NH	EF	44.01 N	71.48 W	26	44.01	-71.48		100	99	105	107	121	123	119	137	115	115	140	128	-10.04	-8.652	-3.7	1.764	8.996	14.02	16.42	15.768	11.416	5.46	-0.508	-6.736
5	US - CA	EF	43.73 N	121.64 W	30	43.73	-121.64		87	61	52	30	25	26	17	20	20	35	80	95	-2.828	-0.628	1.916	4.736	8.58	12.42	16.124	16.144	12.164	7.384	1.388	-2.8
6	US - NM	DF	35.45 N	105.55 W	40	35.45	-105.55		19	16	15	14	26	35	69	80	50	29	18	22	-0.964	1.344	4.312	8.12	13.032	18.176	20.04	19.056	15.54	10.088	4.02	-0.144
7	E	DF	56.16 N	9.57 E	43	56.16	9.57		62	46	51	38	46	58	59	63	72	78	76	71	-0.22	-0.212	2.16	6.112	11.048	14.06	15.916	15.66	12.536	8.536	4.416	1.744
8	AUS	DF	42.13 S	172.16 E	48	-42.13	172.16		321	241	306	290	297	245	237	262	359	309	437	462	12.448	12.66	11.116	7.964	4.616	2.08	1.292	2.404	4.208	6.352	8.484	10.516
9	AS	EF	41 N	127 E	51	41	127		9	13	24	59	80	134	246	217	89	37	28	14	-17.168	-13.972	-7.46	2.316	9.516	14.4	17.476	16.724	10.184	3.044	-6.06	-13.872
10	US - OR	EF	44 N	122 W	51	44	-122		208	155	137	89	59	49	22	31	51	91	200	225	0.108	-0.052	1.24	3.396	6.704	9.912	14.096	13.7	11.548	7.488	2.2	-0.42
11	AS	EF	41.00 N	127.00 E	51	41	127		9	13	24	59	80	134	246	217	89	37	28	14	-17.168	-13.972	-7.46	2.316	9.516	14.4	17.476	16.724	10.184	3.044	-6.06	-13.872
12	US - OR	EF	44.00 N	122.00 W	51	44	-122		208	155	137	89	59	49	22	31	51	91	200	225	0.108	-0.052	1.24	3.396	6.704	9.912	14.096	13.7	11.548	7.488	2.2	-0.42
13	SA	DF	54.78 S	67.68 W	52	-54.7833	-67.6833		62	47	55	57	57	51	52	36	29	35	64	51	8.38	8.052	6.556	4.476	1.96	-0.092	-0.244	0.728	2.44	4.6	6.448	7.468
14	E	EF	59 N	31.30 E	55	59	31.3		37	27	33	36	42	68	72	72	66	58	53	44	-8.8	-8	-3	4.056	10.908	14.812	16.804	15	10.048	4.8	-1.044	-5.7
101	CA	TR	18.28 N	066.07 W	58	18.28	-66.07	on an island	107	77	88	126	202	154	173	216	200	217	189	150	22.62	22.712	23.192	24.108	25.184	26.076	26.232	26.284	26.02	25.572	24.512	23.212
102	CA	TR	9.16 N	79.85 W	59	9.16	-79.85		42	25	16	126	307	294	307	282	262	391	265	77	26.02	26.46	27.208	27.708	27.184	26.344	26.732	26.276	25.944	25.948	25.68	25.624
95	CA	T	9.16 N	79.85 W	61	9.16	-79.85		42	25	16	126	307	294	307	282	262	391	265	77	26.02	26.46	27.208	27.708	27.184	26.344	26.732	26.276	25.944	25.948	25.68	25.624
98	SA	TR	2.30 S	60 W	62	-2.5	-60		254	255	298	315	290	154	111	92	105	145	168	196	25.908	25.816	25.948	26.004	26.068	26.012	25.976	26.592	26.896	27.148	26.944	26.492
15	US - OR	EF	44.14 N	122.11 W	65	44.14	-122.11		227	177	161	116	77	55	22	33	58	109	239	252	2.108	3.352	4.352	6.672	10.288	13.52	16.92	16.96	14.044	9.456	4.4	1.876
16	US - OR	EF	43.35 N	121.15 W	66	43.35	-121.15		38	24	31	18	22	20	13	15	11	17	39	40	-2.128	0.412	3.088	5.688	9.816	13.756	17.272	17.432	13.48	8	1.284	-2.78
17	US - MI	EF	45.98 N	89.45 W	67	45.98	-89.45		31	24	42	56	84	92	91	109	100	66	53	38	-12.704	-10.044	-4.056	3.684	10.996	16.012	18.496	17.316	12.724	6.532	-1.604	-9.3
18	US - NH	EF	44 N	71 W	68	44	-71		88	89	93	104	102	100	95	100	85	103	126	112	-8.064	-6.144	-0.756	5.668	12.368	17.316	20.068	18.944	14.216	8.072	2.276	-4.384
19	US - MN	EF	45.50 N	94.00 W	69	45.5	-94		20	17	37	57	80	115	89	96	77	60	39	20	-12.2	-8.2	-1.4	7.136	14.664	19.416	21.724	20.192	15.228	8.44	-1	-9.1
93	US-PNW-OR	EF	44.30 N	122.30W	70	44.3	-122.3		304	232	215	148	101	69	25	40	78	145	306	329	3.464	3.596	3.84	5.796	8.964	11.936	15.248	15.384	13.54	9.432	4.6	2.7
20	AUS	EF	32.00 S	117.00 E	71	-32	117		14	16	15	22	46	67	66	53	35	21	18	9	25.052	24.984	22.804	18.868	14.972	12.008	10.944	11.12	12.832	15.744	19.604	23.2
21	US-TN	DF	36.01 N	84.27 W	74	36.01	-84.27		97	92	123	95	111	100	120	95	88	75	97	105	2.272	4.4	9.036	13.72	18.308	22.652	24.764	24.136	20.804	14.384	8.804	4.228
22	US-IL	DF	40.00 N	88.23 W	75	40	-88.23		48	49	81	98	109	100	117	101	83	70	85	75	-4.052	-1.48	4.832	11.076	17.288	22.348	24.252	23.012	19.28	12.728	5.596	-0.724
23	AUS	EF	35.35 S	145.00 E	76	-35.35	145		39	24	31	31	38	31	36	38	38	38	30	33	24.012	24.232	21.196	16.6	12.916	9.744	8.9	10.524	12.932	16.06	19.464	22.304
24	US - MN	DF	40.20 N	103 W	77	40.2	-103		8	6	24	32	76	69	70	46	27	19	13	7	-3.332	-0.332	3.696	8.412	14.096	19.8	23.232	22.3	17.22	10.26	2.456	-2.144
25	CN	EF	51.02 N	115.03 W	115	51.02	-115.03		28	26	36	50	76	91	65	68	55	33	29	26	-8.604	-6.152	-3.416	1.436	6.248	10.264	12.948	12.976	8.372	3.872	-3.708	-7.308
26	US - NC	DF	35.04 N	83.25 W	119	35.04	-83.25		167	158	196	143	172	155	157	152	149	140	167	168	1.852	3.476	7.448	11.452	15.532	19.192	21.264	20.74	18.052	12.488	7.604	3.668
27	US - SC	EF	34.00 N	80.00 W	121	34	-80		108	89	110	74	92	122	138	131	97	74	67	87	6.768	8.68	12.808	17	21.3	25	27	26.2	23.4	17.448	12.684	8.4
28	US - WA	EF	47.2 N	121.3 W	122	47.2	-121.3		302	216	185	128	88	76	34	46	90	161	280	324	-3.312	-1.844	0.144	2.86	6.672	10.22	13.484	14.308	10.956	6.148	0.164	-3.24
29	US - WA	EF	47.55 N	120.3 W	122	47.55	-120.3		68	44	31	21	20	19	10	15	16	24	60	73	-3.384	-0.332	3.62	7.568	11.868	15.676	19.54	19.484	14.904	8.46	1.768	-3.136
99	AUS	TR	18.5 S	146.12 E	128	-18.5	146.12		435	851	606	560	292	101	111	96	83	90	187	189	25.008	24.756	23.752	22.22	20.32	18.024	17.136	18.324	20.284	22.288	23.928	24.724
100	AS	TR	2.95 N	102.25 E	131	2.95	102.25		143	127	143	188	186	105	106	119	146	218	253	213	25.876	26.572	27.136	27.572	27.488	27.064	26.796	26.696	26.68	26.744	26.388	26.016
30	US - NH	DF	43.56 N	71.45 W	134	43.56	-71.45		75	72	75	88	93	91	95	94	80	91	105	89	-7.692	-6.044	-0.652	5.76	12.44	17.584	20.796	19.78	15.16	8.928	3.364	-3.184
31	US - MN	DF	44.42 N	93.30 W	141	44.42	-93.3		23	20	49	70	93	98	106	104	87	58	43	27	-11.204	-7.4	-0.568	7.612	14.656	19.744	22.2	20.708	15.7	9.088	-0.044	-7.912
32	US - MN	DF	43.54 N	91.46 W	141	43.54	-91.46		24	23	51	89	91	109	101	105	98	61	49	36	-10.232	-6.896	0.192	7.936	14.52	19.712	21.504	20.344	15.788	9.312	0.816	-6.62
33	US - CO	EF	39.53 N	105.55 W	146	39.53	-105.55		30	27	37	44	51	44	64	62	40	30	32	35	-5.764	-5.644	-3.864	-0.8	4.856	9.812	12.568	12.012	8.28	3.396	-2.68	-5.312
34	E	EF	59.52 N	9.56 E	163	59.52	9.56		74	50	70	56	66	88	95	99	108	119	107	70	-5.788	-6.576	-2.62	1.756	7.896	12.26	14.396	12.76	7.844	3.404	-1.868	-4.508
96	A	TD	6.15 N	0.91 W	179	6.15	-0.19		23	55	117	138	160	208	115	70	134	154	75	39	25.904	27.096	27.256	27.008	26.348	25.156	24.356	24.176	24.764	25.376	25.852	26.12
35	E	DF	51.00 N	0.00 E	188	51	0		86	55	59	50	48	57	42	51	69	83	87	87	4.464	4.528	6.46	8.428	11.808	14.584	16.856	16.872	14.288	10.916	7.152	5.472
94	CA	TR	8.78 N	82.95 W	189	8.78	-82.95		39	49	50	178	363	364	242	297	402	530	292	98	20.376	20.904	21.8	22.072	21.688	21.04	21.268	20.888	20.488	20.192	20.072	19.98
36	E	MF	52.8158 N	6.5145 E	190	52.8158	6.5145		76	54	69	50	60	76	79	58	77	76	82	84	2.084	2.32	5.068	7.82	12.116	14.708	16.628	16.616	13.52	9.7	5.616	3.1
37	US - WA	EF	47.12 N	122 W	191	47.12	-122		234	179	162	143	110	89	48	51	88	145	252	232	2.76	3.988	5.096	7.356	10.436	13.284	15.996	16.756	13.868	9.572	5.104	2.784
38	US - WA	EF	47.12 N	122 W	191	47.12	-122		234	179	162	143	110	89	48	51	88	145	252	232	2.76	3.988	5.096	7.356	10.436	13.284	15.996	16.756	13.868	9.572	5.104	2.784
39	AUS	EF	43.25 S	172.16 E	195	-43.25	172.16		93	68	90	79	87	72	90	91	71	90	82	92	15.456	15.424	13.736	10.868	7.676	5.396	4.872	5.728	7.976	10.312	12.028	14.06
40	US - TN	DF	35.4 N	83.3 W	196	35.4	-83.3		129	128	155	114	131	120	128	118	104	92	113	128	2.12	3.896	7.988	12.092	16.336	20.192	22.352	21.876	19.06	13.072	8.016	3.964
41	E	EF	59 N	31.30 E	197	59	31.3		37	27	33	36	42	68	72	72	66	58	53	44	-8.8	-8	-3	4.056	10.908	14.812	16.804	15	10.048	4.8	-1.044	-5.7
42	CN	EF	50.00 N	118.00 W	198	50	-118		114	75	75	72	75	86	65	61	63	79	114	111	-5.264	-3.028	0.4	4.6	9.308	13.084	15.852	15.944	11.112	5.432	-0.616	-4.612
43	E	EF	50.45 N	11.45 E	199	50.45	11.45		94	77	85	74	73	96	97	83	79	84	94	115	-2.464	-1.876	1.412	5.092	10.34	13.304	15.204	14.96	11.076	6.464	1.532	-1.148
44	US - IN	DF	38.45 N	86.25 W	201	38.45	-86.25		82	79	111	115	121	101	113	99	79	75	100	94	-0.956	1.42	6.86	12.324	17.52	22.184	24.384	23.512	19.872	13.344	7.356	1.796
45	AUS	DF	25.00 S	117.00 E	202	-25	117		24	38	30	26	30	34	26	11	4	4	6	11	32.64	31.6	30.112	25.38	20.224	16.08	14.78	16.596	19.576	23.396	27.088	30.584
46	US - LA	DF	31.00 N	92.00 W	203	31	-92		149	126	143	130	145	118	115	109	112	109	133	162	9.112	11.4	15.4	19.256	23.5	26.724	27.908	27.6	25.104	19.7	14.636	10.832
47	CN	EF	56.31 N	109.72 W	204	56.31	-109.72		19	17	17	21	40	70	86	70	47	30	24	20	-19.84	-14.816	-8.492	1.8	8.74	13.748	16.208	14.856	8.9	2.2	-9.164	-17.336
48	E	DF	52.00 N	117.00 W	204	52	-117		94	69	72	57	73	98	101	95	73	86	99	78	-12.396	-10.656	-8.672	-4.272	1.204	5.588	8.84	9.644	4.908	-0.844	-7.632	-13.06
49	E	EF	35.00 E	57.00 N	206	57	35		38	30	29	36	57	75	88	74	67	55	49	44	-8.888	-7.9	-2.348	4.988	11.496	15.812	17.3	15.42	10.028	4.364	-2.308	-6.3
50	E	DF	52.00 N	1.00 W	208	52	-1		57	41	51	46	52	56	45	56	58	57	59	61	4.1	4	5.956	7.82	11.416	14.352	16.8	16.488	13.856	10.32	6.784	4.8
51	E	DF	52.00 N	1.00 W	208	52	-1		57	41	51	46	52	56	45	56	58	57	59	61	4.1	4	5.956	7.82	11.416	14.352	16.8	16.488	13.856	10.32	6.784	4.8
52	E	EF	59.7176 N	30.406 E	209	59.7176	30.406		40	31	35	33	40	64	79	79	69	65	57	50	-8.1	-7.272	-2.552	4	10.512	15.032	16.96	15.26	10.16	4.792	-0.864	-5.608
53	E	EF	59.7176 N	30.406 E	209	59.7176	30.406		40	31	35	33	40	64	79	79	69	65	57	50	-8.1	-7.272	-2.552	4	10.512	15.032	16.96	15.26	10.16	4.792	-0.864	-5.608
54	E	EF	59.7176 N	30.406 E	209	59.7176	30.406		40	31	35	33	40	64	79	79	69	65	57	50	-8.1	-7.272	-2.552	4	10.512	15.032	16.96	15.26	10.16	4.792	-0.864	-5.608
55	E	EF	59.7176 N	30.406 E	209	59.7176	30.406		40	31	35	33	40	64	79	79	69	65	57	50	-8.1	-7.272	-2.552	4	10.512	15.032	16.96	15.26	10.16	4.792	-0.864	-5.608
56	AS	EF	60.00 N	89.42 E	210	60	89.42		32	23	22	30	48	60	64	72	59	54	49	41	-22.12	-19.408	-10.132	-1.36	6.5	14.736	18.688	14.6	7.34	-1.984	-12.52	-19.372
57	US-OR-HJA	EF	44.14 N	122.11 W	212	44.14	-122.11		227	177	161	116	77	55	22	33	58	109	239	252	2.108	3.352	4.352	6.672	10.288	13.52	16.92	16.96	14.044	9.456	4.4	1.876
58	US-OR-KRD	EF	42.34 N	122.1 W	212	42.34	-122.1		171	139	137	94	67	42	18	25	39	83	179	188	-1.616	-1.52	-1.084	0.768	3.992	6.804	12.376	12.044	9.572	6.164	0.652	-1.844
59	US-CA-SNP	EF	36.50 N	118.56 W	212	36.5	-118.56		137	113	103	68	27	13	16	22	31	36	102	116	-6.196	-5.864	-5.572	-3.592	8.05e-09	5.18	10.44	11.612	8.6	4.216	-1.224	-5.084
60	US-OR-PFEF	EF	43.73 N	121.64 W	212	43.73	-121.64		87	61	52	30	25	26	17	20	20	35	80	95	-2.828	-0.628	1.916	4.736	8.58	12.42	16.124	16.144	12.164	7.384	1.388	-2.8
61	US-CO-FEF	EF	39.85 N	105.91 W	212	39.85	-105.91		52	45	57	64	58	44	56	55	44	36	48	53	-8.092	-7.42	-5.464	-2.416	2.912	7.904	11.26	10.664	6.832	1.716	-4.588	-7.476
62	US-OR-KRD	EF	42.34 N	122.1 W	212	42.34	-122.1		171	139	137	94	67	42	18	25	39	83	179	188	-1.616	-1.52	-1.084	0.768	3.992	6.804	12.376	12.044	9.572	6.164	0.652	-1.844
63	US-OR-FRISS	EF	44.14 N	122.11 W	212	44.14	-122.11		227	177	161	116	77	55	22	33	58	109	239	252	2.108	3.352	4.352	6.672	10.288	13.52	16.92	16.96	14.044	9.456	4.4	1.876
64	US-OR-WSR	EF	45.00 N	121.50 W	212	45	-121.5		141	98	81	56	45	36	16	25	40	67	140	148	-0.84	1.816	4.224	6.632	10.032	13.708	17.116	17.516	13.904	8.86	3.228	-0.26
65	US-OR-CHEF	EF	45.12 N	123.12 W	212	45.12	-123.12		168	133	116	68	47	31	12	16	39	76	165	189	4.408	6.248	8.188	9.992	13.092	15.864	19.012	19.172	16.732	11.856	7.368	4.46
66	US-WA-WREF	EF	45.49 N	121.57 W	212	45.49	-121.57		208	153	125	81	60	43	16	25	49	88	192	212	-0.588	1.396	4.132	6.568	10.14	13.508	16.628	17.044	13.704	8.904	3.44	-0.132
67	RUS-Khabarovsk	MF	49.00 N	140.00 E	213	49	140		22	23	36	58	75	69	93	121	111	90	44	31	-18.676	-15.784	-8.844	0.584	6.412	11.796	15.388	16.156	11.488	3.668	-7.008	-15.092
68	RUS-St.-Petersburgá	DF	59.00 N	31.5 E	213	59	31.5		38	27	36	37	42	67	72	73	67	60	54	45	-9.316	-8	-3.02	4.008	10.952	14.908	16.792	15.104	10.116	4.804	-1.216	-5.7
69	RUS-Irkutsk	DF	52.00 N	104.00 E	213	52	104		13	9	13	29	45	86	140	114	75	30	25	18	-16.888	-14.724	-8.616	-0.044	7.284	13.264	16.1	14.02	7.668	-0.64	-8.992	-14.2
70	RUS-Krasnoyarsk	DF	56.00 N	93.00 E	213	56	93		17	13	15	29	45	57	75	69	42	44	34	25	-16.984	-15.5	-8.556	1.86	9.452	15.82	18.472	15.436	8.956	1.496	-8.104	-14.404
71	US-OR-SW	EF	42.29 N	123.9 W	214	42.29	-123.9		300	234	230	126	69	28	9	23	42	119	289	328	6.08	7.06	7.456	8.448	12.28	15.964	19.584	19.944	17.368	12.248	8.06	5.58
72	US-SE	EF	34.50 N	81.7 W	215	34.5	-81.7		117	103	125	79	89	101	102	107	102	94	86	91	5.264	7.312	11.484	15.84	20.196	24.324	26.488	25.64	22.448	16.176	11.056	6.816
73	CN-Quebec	MF	48.59 N	79.24 W	216	48.59	-79.24		50	37	47	48	81	93	97	107	107	85	65	60	-18.016	-16.292	-9.036	0.176	9.008	14.3	17.44	16	11.016	4.796	-3.624	-12.812
74	AUS-NZ	EF	38.13 S	176.00 E	218	-38.13	176		130	126	138	128	152	173	184	163	175	157	149	187	15.892	16.024	14.64	11.812	8.948	6.736	6.016	6.96	8.576	10.548	12.584	14.56
75	AUS-NZ	EF	38.48 S	176.3 E	219	-38.48	176.3		100	96	126	132	128	125	114	122	131	124	102	124	17.636	17.668	15.884	12.496	9.184	6.932	6.244	7.608	9.74	11.876	13.984	16.08
76	CN-Alberta	EF	52.00 N	120.00 W	220	52	-120		81	56	54	43	59	80	72	69	63	80	99	90	-7.52	-4.38	-0.584	3.976	8.684	12.4	14.58	14.52	9.92	4.524	-1.94	-6.604
77	E-Germany	DF	51.00 N	12.00 E	221	51	12		32	31	40	41	60	66	73	67	49	38	46	42	-0.088	0.572	4.04	7.904	12.736	15.848	17.928	17.976	14.188	9.184	4.212	1.592
78	US-WA-WREF	EF	45.49 N	121.58 W	222	45.49	-121.58		208	153	125	81	60	43	16	25	49	88	192	212	-0.588	1.396	4.132	6.568	10.14	13.508	16.628	17.044	13.704	8.904	3.44	-0.132
79	US-NH	DF	43.56 N	71.45 W	223	43.56	-71.45		75	72	75	88	93	91	95	94	80	91	105	89	-7.692	-6.044	-0.652	5.76	12.44	17.584	20.796	19.78	15.16	8.928	3.364	-3.184
80	RUS	EF	63.00 N	35.00 E	224	63	35		39	32	36	37	43	65	68	84	71	72	60	50	-12.288	-11.176	-5.348	0.188	6.932	12.76	15.512	13.008	7.956	1.532	-4.832	-9.4
81	AUS	EF	35.30 S	150.15 E	225	-35.3	150.15		85	94	111	85	73	91	46	60	64	83	89	71	20.032	20.296	18.668	15.532	12.884	10.492	9.616	10.408	12.328	14.824	16.632	18.944
82	AUS	EF	37.33 S	145.27 E	225	-37.33	145.27		60	47	51	69	91	104	101	110	101	88	74	66	18.74	19.444	17.32	13.736	10.764	8	6.876	7.764	9.36	11.808	14.152	16.724
83	AUS	EF	35.25 S	148.55 E	225	-35.25	148.55		70	64	78	92	115	117	120	139	101	111	120	75	17.656	17.684	14.956	11.032	7.732	4.608	3.284	4.416	6.936	10.272	12.824	15.632
84	RUS	EF	63.94 N	57.89 E	225	63.94	57.89		43	32	31	39	49	65	77	80	68	68	60	51	-19.388	-15.256	-7.648	-2.696	3.556	11.908	15.856	11.252	6.316	-1.44	-11.208	-16.304
85	AUS	EF	43.09 S	146.66 E	226	-43.09	146.66		89	76	93	123	141	133	166	173	160	153	125	123	13.86	14.072	12.7	10.476	8.468	6.376	5.94	6.888	8.26	9.844	11.236	12.728
86	E-Germany	DF	51.72 N	9.62 E	227	51.72	9.62		97	75	86	60	73	80	85	77	79	80	93	102	-0.112	0.012	3.044	6.12	11.04	13.96	15.74	15.592	12.004	7.688	3.848	1.148
87	US-IN	DF	38.45 N	86.25 W	228	38.45	-86.25		82	79	111	115	121	101	113	99	79	75	100	94	-0.956	1.42	6.86	12.324	17.52	22.184	24.384	23.512	19.872	13.344	7.356	1.796
88	US-MN	DF	48.60 N	93.40 W	229	48.6	-93.4		23	18	29	37	66	104	90	82	81	53	36	20	-16.072	-12.14	-4.996	3.66	11.544	16.836	19.112	18.16	12.668	5.916	-3.444	-12.5
89	US-AK	EF	60.54 N	150.76 W	230	60.54	-150.76		66	56	44	34	38	39	49	85	120	111	71	83	-7.944	-6.44	-2.916	2.176	7.396	11.952	14.432	13.264	8.868	1.856	-4.468	-6.772
90	US-NC	DF	35.91 N	79.05 W	231	35.91	-79.05		103	92	109	79	108	99	105	111	103	91	86	82	3.848	5.712	10.056	14.948	19.264	23.54	25.78	24.928	21.624	15.22	10.352	5.732
91	US-MN-MEF	EF	47.32 N	93.28 W	231	47.32	-93.28		24	15	30	47	72	112	110	97	78	65	36	22	-14.992	-11.328	-4.256	4.028	11.704	16.66	19.388	18.2	12.92	6.508	-2.504	-11.116
92	US-CO-FEF	EF	39.85 N	105.91 W	231	39.85	-105.91		52	45	57	64	58	44	56	55	44	36	48	53	-8.092	-7.42	-5.464	-2.416	2.912	7.904	11.26	10.664	6.832	1.716	-4.588	-7.476
110	CA-MEX	TR	18.58 N	95.08 W	231	18.58	-95.08		99	58	44	35	70	267	310	311	454	387	215	204	21.9458	22.3542	24.6792	26.6958	28.2667	27.9042	27.1833	27.2042	26.9125	25.675	24.3875	22.5125
111	CA-MEX	TD	18.5 N	88.5 W	231	18.5	-88.5		61	28	23	35	77	187	158	139	188	144	77	68	23.36	24.088	25.676	26.896	27.696	27.648	27.528	27.784	27.476	26.516	25.012	23.724
103	AS	ST	23.25 N	112.5 E	232	23.25	112.5		44	72	113	195	306	280	220	248	145	74	41	38	12.772	13.6	17.188	21.764	25.248	27.304	28.148	27.78	26.508	23.152	18.72	14.588
104	CA	TD	18.82 N	89.45 W	233	18.82	-89.45		47	20	18	35	88	130	109	133	169	109	57	51	21.708	22.484	24.184	25.568	26.56	26.528	26.18	26.208	25.9	24.888	23.108	21.932
105	AUS	EF	35.3 S	149.3 E	234	-35.3	149.3		68	54	53	54	49	46	52	56	64	68	73	53	19.008	18.948	16.724	12.648	9.136	5.876	4.784	6.088	8.716	11.756	14.26	17.212
106	E	EF	52.95 N	7.25 W	235	52.95	-7.25		118	94	87	69	75	70	74	94	99	115	113	120	5.168	5.392	6.536	7.952	10.736	13.22	15.224	14.968	12.808	9.964	7.088	5.868
107	US-TN	DF	35.4 N	83.3 W	236	35.4	-83.3		129	128	155	114	131	120	128	118	104	92	113	128	2.12	3.896	7.988	12.092	16.336	20.192	22.352	21.876	19.06	13.072	8.016	3.964
108	SA	TR	12.58 S	69.18 W	237	-12.58	-69.18		323	316	281	152	102	56	61	66	103	170	234	286	26.072	25.96	26.068	25.58	24.588	23.632	23.62	24.868	25.8	26.456	26.248	26.168
109	A	TR	1.0 S	100.5 E	238	-1	100.5		236	181	234	276	173	116	96	130	183	244	251	232	21.26	21.3	21.548	21.888	22.024	21.416	20.988	20.756	21	21.192	21.168	21.124
